1  
2  
3  
4  
5  
6  
7  
8  
9  
10  
11  
12  
13  
14  
15  
16  
17  
18  
19  
20  
21  
22  
23  
24  
25  
26

**Title: Novel truncating mutations in *CTNND1* cause a dominant craniofacial and cardiac syndrome**

**Authors:** Reham Alharatani<sup>1,2</sup>, Athina Ververi<sup>3\*</sup>, Ana Belezza-Meireles<sup>1,4\*</sup>, Weizhen Ji<sup>5\*</sup>, Emily Mis<sup>5\*</sup>, Quinten T. Patterson<sup>6\*</sup>, John N. Griffin<sup>1,7</sup>, Nabina Bhujel<sup>8</sup>, Caitlin A. Chang<sup>9</sup>, Abhijit Dixit<sup>10</sup>, Monica Konstantino<sup>5</sup>, Christopher Healy<sup>1</sup>, Sumayyah Hannan<sup>1</sup>, Natsuko Neo<sup>1, 11</sup>, Alex Cash<sup>8</sup>, Dong Li<sup>12</sup>, Elizabeth Bhoj<sup>12</sup>, Elaine H. Zackai<sup>12</sup>, Ruth Cleaver<sup>13</sup>, Diana Baralle<sup>14</sup>, Meriel McEntagart<sup>15</sup>, Ruth Newbury-Ecob<sup>16</sup>, Richard Scott<sup>3</sup>, Jane A. Hurst<sup>3</sup>, Ping Yee Billie Au<sup>9</sup>, Marie Therese Hosey<sup>2‡</sup>, Mustafa Khokha<sup>7‡</sup>, Denise K. Marciano<sup>6‡</sup>, Saquib A. Lakhani<sup>5‡</sup> and Karen J. Liu<sup>1</sup>

**Affiliations:**

<sup>1</sup>Centre for Craniofacial and Regenerative Biology, King's College London, UK

<sup>2</sup>Paediatric Dentistry, Centre of Oral, Clinical and Translational Science, King's College London, UK

<sup>3</sup>Clinical Genetics, Great Ormond Street Hospital, London, UK

<sup>4</sup>Genetics Department, Guy's and St. Thomas' NHS Foundation Trust, London, UK

<sup>5</sup>Pediatric Genomics Discovery Program, Department of Pediatrics, Yale University School of Medicine, New Haven, CT 06520, USA

<sup>6</sup>Departments of Medicine and Cell Biology, University of Texas Southwestern Medical Center, Texas, USA

<sup>7</sup>Pediatric Genomics Discovery Program, Departments of Genetics and Pediatrics, Yale University School of Medicine, New Haven, CT 06520, USA

<sup>8</sup>South Thames Cleft Unit, Guy's and St. Thomas' NHS Foundation Trust, London, UK

<sup>9</sup>University of Calgary, Alberta Children's Hospital Research Institute, Calgary, Alberta, Canada

<sup>10</sup>Nottingham University Hospitals NHS Trust, City Hospital Campus, Nottingham, UK

<sup>11</sup>Tokyo Medical and Dental University, Tokyo, Japan

27 <sup>12</sup>Department of Pediatrics, Division of Human Genetics, Children's Hospital of Philadelphia, USA

28 <sup>13</sup>Peninsula Clinical Genetics Service, Royal Devon and Exeter NHS Foundation Trust, Exeter, UK

29 <sup>14</sup>Human Development and Health, Faculty of Medicine, University of Southampton, Southampton,

30 United Kingdom

31 <sup>15</sup>Department of Clinical Genetics, St George's Hospital, London, UK

32 <sup>16</sup>Clinical Genetics, University Hospital Bristol NHS Foundation Trust, Bristol, UK

33 \*These authors contributed equally.

34 ±These authors contributed equally.

35

36 **Email for correspondence:** [karen.liu@kcl.ac.uk](mailto:karen.liu@kcl.ac.uk)

37

38 **Keywords.** *CTNND1*; p120-catenin; craniofacial, cardiac; blepharocheilodontic syndrome; cleft lip

39 and palate; hypodontia; neural; larynx; *Xenopus*; mouse

40

41 **Abstract:**

42 *CTNND1* encodes the p120-catenin (p120) protein, which has a wide range of functions,

43 including the maintenance of cell-cell junctions, regulation of the epithelial-mesenchymal transition

44 and transcriptional signaling. Due to advances in next generation sequencing, *CTNND1* has been

45 implicated in human diseases including cleft palate and blepharocheilodontic syndrome (BCD) albeit

46 only recently. In this study, we identify eight novel protein-truncating variants, six *de novo*, in

47 thirteen participants presenting with craniofacial dysmorphisms including cleft palate and

48 hypodontia, as well as congenital cardiac anomalies, limb dysmorphologies and neurodevelopmental

49 disorders. Using conditional deletions in mice as well as CRISPR/Cas9 approaches to target *CTNND1*

50 in *Xenopus*, we identified a subset of phenotypes that can be linked to p120-catenin in epithelial

51 integrity and turnover, and additional phenotypes that suggest mesenchymal roles of *CTNND1*. We

52 propose that *CTNND1* variants have a wider developmental role than previously described, and that

53 variations in this gene underlie not only cleft palate and BCD but may be expanded to a broader  
54 velocardiofacial-like syndrome.

55

## 56 **Introduction**

57 Genetic variation in *CTNND1*, which encodes for the armadillo-repeat protein p120-catenin  
58 (p120), is associated with human birth defects, most notably non-syndromic cleft palate and  
59 blepharochelidontic (BCD) syndrome, which involves eyelid, lip and tooth anomalies [MIM:  
60 617681]<sup>1-3</sup>. In contrast, *CTNND1* has broader developmental roles in animal models. For example,  
61 conditional deletions in mice demonstrate the importance of *CTNND1* for development not only for  
62 skin and teeth, but also for kidneys and other structures<sup>4-10</sup>, and complete deletion of *CTNND1* leads  
63 to prenatal lethality<sup>5,9</sup>. Similarly, loss-of-function experiments in *Xenopus* implicate *CTNND1* in  
64 craniofacial development<sup>11,12</sup>. Here, we describe a series of patients with *CTNND1* variants, all of  
65 whom present with multisystem involvement that demonstrates a broad spectrum craniofacial and  
66 cardiac syndrome.

67 p120-catenin is a member of the catenin superfamily of proteins studied in catenin-cadherin  
68 interactions; notably, it binds to and stabilizes E-cadherin (*CDH1*) at junctional complexes in  
69 epithelia<sup>13-17</sup>. This binding is via the p120-catenin armadillo repeat domain, and displacement of  
70 p120-catenin from E-cadherin is a key regulatory event at the adherens junction, that results in  
71 endocytosis of E-cadherin and loss of the junction. The protein has a second function as a scaffolding  
72 protein for the GTPase RhoA and associated Rho regulatory proteins<sup>18,19</sup>. In addition, it can also  
73 directly interact with the zinc finger transcriptional repressor Kaiso (ZBTB33), facilitating Wnt signal  
74 transduction<sup>20,21</sup>. Thus, p120-catenin appears to be a multi-functional protein, promoting epithelial  
75 stability when in complex with E-cadherin, and regulating RhoA and transcriptional activities. p120-  
76 catenin is also able to associate with mesenchymal cadherins such as N-cadherin and cadherin-  
77 11<sup>17,22</sup>. In mesenchymal cells, p120-catenin associates with non-epithelial cadherins, regulating  
78 motility and invasion via cytoskeletal events and transcription. Given its functions in both epithelia

79 and mesenchyme, it is unsurprising that both loss and gain of p120-catenin have been associated  
80 with oncogenesis<sup>23-25</sup>.

81 In humans, the *CTNND1* gene is located at 11q11 and consists of 21 exons, of which exons  
82 11, 18 and 20 are alternatively spliced. Inclusion of exon 11, which is predominantly neural, disrupts  
83 a nuclear localization signal (NLS), while exon 20 contains a nuclear export signal (NES)<sup>26</sup>. In addition,  
84 there are four additional isoforms of the protein, which vary in their transcriptional start sites. Of the  
85 four major isoforms, isoform 1 is abundant in mesenchymal cells, while isoform 3 appears  
86 preferentially expressed in epithelial cells<sup>27-30</sup>. The other two isoforms are less well characterized.

87 The p120 superfamily includes p120-catenin itself,  $\delta$ -catenin (*CTNND2*) and *ARVCF*  
88 (armadillo repeat gene deleted in velocardiofacial syndrome) all of which can compete for E-  
89 cadherin binding. Although it is unclear whether they substitute for one another in other cellular  
90 functions<sup>31,32</sup>, evidence from animal studies suggests some compensatory roles. For instance,  $\delta$ -  
91 catenin (*CTNND2*) knockdown phenotypes can be rescued with p120-catenin, and the combined  
92 depletion of  $\delta$ -catenin and p120 generates more pronounced effects. However, levels of p120 are  
93 not altered by reducing  $\delta$ -catenin protein levels<sup>33</sup>. In humans, *CTNND2* variants have been associated  
94 with autism spectrum disorders and other neurodevelopmental conditions<sup>34-39</sup>. Interestingly, the  
95 other p120 family member, *ARVCF*, lies in 22q11. While loss of *TBX1* in 22q11 is thought to cause the  
96 key malformations associated with velocardiofacial (VCF) syndrome [MIM: 192430], evidence from  
97 animal models suggests that *ARVCF* may also play a role in craniofacial development<sup>40-43</sup>.

98 Although both p120-catenin and its binding partner E-cadherin have been proposed as  
99 causative genes in non-syndromic palatal clefting and BCD syndrome<sup>1-3</sup>, the patients that we  
100 describe here present with a multisystem condition broader than the previously described p120-  
101 associated BCD cases. While our patients consistently possess palatal phenotypes (cleft or high  
102 arched palate) as well as eyelid and tooth anomalies, they also display additional features including  
103 severe hypodontia, cardiac, limb and neurodevelopmental anomalies. We hypothesize that these  
104 novel truncating variants in *CTNND1* affect both E-cadherin-dependent and -independent functions

105 of p120-catenin, and, given the range of phenotypes seen in our cohort, should be considered more  
106 broadly to cause a VCF-like syndrome.

107

## 108 **Subjects and Methods**

### 109 ***Recruitment, consent and sample collection***

110 Participants were recruited from one of following: South Thames Cleft Unit at Guy's and St  
111 Thomas Trust (GSTT), London, UK; the University of Calgary, Alberta Children's Hospital, Canada;  
112 from the Children's Hospital of Philadelphia, USA; or, from the Deciphering Developmental Disorders  
113 (DDD) Study, United Kingdom ([www.ddduk.org](http://www.ddduk.org)). *CTNND1* data access was specifically collected  
114 under DDD Project CAP180, focusing on cranial neural crest anomalies (ABM/KJL). All individual  
115 study protocols were approved by local Institutional Review Boards, including UK Ethics: GSTT  
116 (REC16/NI/0026, Northern Ireland REC), DDD (10/H0305/83, Cambridge South REC, and GEN/284/12,  
117 Republic of Ireland REC).

118 Medical and dental histories were taken, as well as detailed phenotyping by clinical  
119 geneticists with expertise in dysmorphology. Saliva for DNA extraction was collected from family  
120 trios using the Oragene® DNA (OG-500) kit. All patients also underwent high-resolution analysis for  
121 copy number abnormalities using array-based comparative genomic hybridization. Informed consent  
122 from all participants was obtained for publication of data and photographs in the medical literature.  
123 All families were offered genetic counseling.

124

### 125 ***Exome sequencing and variant screening***

126 Exome sequencing from trios was performed to identify gene variants. For patients recruited  
127 from DDD<sup>44</sup>, genomic DNA samples from trios were analysed at the Wellcome Trust Sanger Institute.  
128 Exome sequencing was performed using a custom Agilent SureSelect Exome bait design (Agilent  
129 Human All Exon V3 Plus with custom ELID # C0338371), 8-plex sample multiplexing and an Illumina  
130 HiSeq with 4 samples per lane and a mean depth of 50X. The exome analysis targeted 58.62 Mb of

131 which 51.64 Mb consisted of exonic targets (39 Mb) and their flanking regions and 6.9 Mb consisted  
132 of regulatory regions. Alignment was performed using BWA1. Putative *de novo* variants were  
133 identified from trio BAM files using DeNovoGear5. Variants were annotated with the most severe  
134 consequence predicted by Ensembl Variant Effect Predictor (VEP version 2.6), and minor allele  
135 frequencies from a combination of the 1000 Genomes project ([www.1000genomes.org](http://www.1000genomes.org)), UK10K  
136 ([www.uk10k.org](http://www.uk10k.org)), the NHLBI Exome Sequencing Project ([esp.gs.washington.edu](http://esp.gs.washington.edu)), Scottish Family  
137 Health Study ([www.generationscotland.org](http://www.generationscotland.org)), UK Blood Service and unaffected DDD parents. All  
138 flagged variants were automatically annotated with pathogenicity scores from two variant  
139 prioritisation algorithms (SIFT23 and PolyPhen24) and compared against the public Human Gene  
140 Mutation Database (HGMD) and the Leiden Open Variation Database (LOVD). For selected probands,  
141 Exome sequencing performed at the Yale Center for Genomic Analysis used genomic DNA isolated  
142 from saliva from the probands and their parents. The exons and their flanking regions of the genome  
143 were captured using IDT xGen exome capture kit followed by Illumina DNA sequencing (HiSeq 4000).  
144 Paired end sequence reads were converted to FASTQ format and were aligned to the reference  
145 human genome (hg19). GATK best practices were applied to identify genetic variants, and variants  
146 were annotated by ANNOVAR. Probands and parents were sequenced to a mean depth of 93-123  
147 independent reads per targeted base across all the samples. In an average of 94.0% of targeted  
148 bases in all of the samples, the coverage was greater than 20X independent reads. Trio exome  
149 sequencing analysis on variants with allele frequency of less than 1% was carried out to identify *de*  
150 *novo* variants that are absent from the parents. Putative disease-causing variants were validated  
151 using whole genome amplified DNA, PCR and capillary sequencing.

152

### 153 ***Mouse and Xenopus husbandry***

154 Animal work was performed in accordance with UK Home Office Project License P8D5E2773  
155 at King's College London (KJL), University of Texas Southwestern Medical Center Institutional Animal  
156 Care and Use Committee protocols (DKM), the European *Xenopus* Resource Centre, Portsmouth UK,

157 or the Yale University Institutional Animal Care and Use Committee protocols (MKK). Mice were  
158 genotyped according to standard procedures. Gestational ages for mice were determined by the  
159 observation of vaginal plugs, which was considered embryonic day 0.5 (E0.5) and further staging of  
160 animals according to Kaufman<sup>45</sup>. The following mouse strains were used: *Ctnnd1*<sup>fl/fl</sup> (MGI ID:  
161 3640772)<sup>8</sup>; *β-actin::cre* (JAX strain 019099)<sup>46</sup>; and *Wnt1::cre* (JAX strain 022501)<sup>47</sup>. For each mouse  
162 experiment, a minimum of n=3 was examined unless otherwise noted. *X. tropicalis* embryos were  
163 produced by *in vitro* fertilization and raised to appropriate stages in 1/9MR + gentamycin as per  
164 standard protocols<sup>48</sup>. For *Xenopus* experiments, experimental numbers are stated in figures, with a  
165 minimum of n=30 in all experimental conditions.

166

#### 167 **Human specimens**

168 Human embryonic and fetal material was provided by the Joint MRC/Wellcome Trust (grant  
169 # 099175/Z/12/Z) Human Developmental Biology Resource (HDBR, <http://www.hdbr.org>) as whole  
170 embryos (Carnegie stage 13 (C13, day 28-32)) or sectioned embryos (Carnegie stage 21 (C21, day 50-  
171 52)).

172

#### 173 **Generation of CTNND1 probe and mRNA in situ hybridization**

174 A human *CTNND1* clone was identified from the Human ORFeome Collaboration<sup>49</sup> (clone  
175 HsCD00513511), encoding *CTNND1* isoform 4, including the entirety of the armadillo repeats and the  
176 C-terminal domain. Probes made from this clone should recognize all four *CTNND1* transcripts.  
177 Digoxigenin-labeled antisense mRNA probes were produced by linearizing human *CTNND1* clones  
178 using BamH1 restriction enzyme, which produces a probe size of ~900 base pairs, and *in vitro*  
179 transcription with the T7 High Yield RNA Synthesis Kit (E2040S) from New England Biolabs. *In situ*  
180 hybridization of mRNA on whole mount and paraffin embedded tissue sections was carried out as  
181 per standard protocols<sup>50</sup>, using an anti-digoxigenin-alkaline phosphatase coupled antibody.

182

183 ***Immunofluorescent antibodies and staining***

184 For immunostaining, mouse embryos at the indicated stages were fixed and processed  
185 according to standard protocols. Antigen retrieval was carried out in Tris-EDTA (pH 9) in a 90°C  
186 water-bath for 30 minutes. Primary antibodies used were: phospho-tyrosine p120-catenin clone  
187 2B12, mouse mAb (1:150, Biolegend, Cat. No. 828301); delta 1 Catenin/CAS (phospho S-268)  
188 antibody [EPR2380], rabbit mAB (1:150, Abcam, Cat. No. ab79545); E-Cadherin [M168], mouse mAB  
189 (1:150, Abcam, Cat. No. ab76055); anti-E-cadherin (24E10), rabbit mAb (1:250, Cell Signaling  
190 Technology, Cat. No. 3195); rabbit anti-Pax2 Antibody (1:100, ThermoFisher Scientific, Cat. No. 71-  
191 6000); and mouse anti-Collagen Type II, clone 6B3 (1:50, MERCK, Cat. No. MAB8887). Secondary  
192 antibodies used were: Alexa Fluor® 488 (Invitrogen, A-11008), Alexa Fluor® 488 (Invitrogen, A-  
193 21204), Alexa Fluor® 546 (Invitrogen, A-11060), Alexa Fluor® 568 (Invitrogen, A-11011), Alexa Fluor®  
194 594 (Invitrogen, A-21207), Alexa Fluor® 647 (Invitrogen, A-21235). All were diluted to 1:400 in  
195 phosphate-buffered saline (PBS) containing 0.5% Triton® X-100 (Sigma-Aldrich) and 1% bovine serum  
196 albumin. Slides were mounted in Fluoroshield Mounting Medium with DAPI (Abcam, ab104139) and  
197 cover slipped. *Xenopus* whole mount embryos and tadpoles were incubated with Hoechst (1:5000 of  
198 20mg/ml, diluted in PBST). For hematoxylin and eosin (H&E) staining, slides were fixed, sectioned  
199 and stained according to standard protocols. Slides were then cover slipped with Neo-Mount (VWR,  
200 Cat. No. 1.09016.0500).

201

202 ***Image acquisition***

203 Images for sectional *in situ* hybridization experiments and for H&E slides were captured  
204 using a brightfield microscope (Nikon ECLIPSE Ci-L), with an attached camera (Nikon digital sight DS-  
205 Fi1) or with a NanoZoomer 2.ORS Digital Slide Scanner (Hamamatsu); NDP.view2 Viewing Software  
206 (U12388-01) was used to analyze the scanned images. Whole mount images of mouse pups and  
207 embryos, *Xenopus* and human embryos were captured using a Nikon SMZ1500 stereomicroscope  
208 with a Nikon digital sight DS-Fi1 (112031) camera. Fluorescent images of mouse palates and *Xenopus*



209 epithelial cells were either acquired on a Leica SP5 confocal or Nikon A1R point scanning confocal; z-  
210 stacks of whole mount *Xenopus* tadpoles were captured by mounting the tadpoles on a Cellview Cell  
211 Glass Bottom Culture Dish (PS, 35/10 mm, CELLview™, Cat. No. 627860) in PBS. Image sequences  
212 were processed using the FIJI (Image J) analysis software.

213

#### 214 ***Micro-computed tomography (μCT)***

215 For soft tissue scanning, mouse embryos were stained with a near isotonic 1% I2, 2%  
216 potassium iodine solution for 3 days and scanned to produce 6um voxel size volumes, using X-ray  
217 settings of 90kVp, 66uA and a 0.5 mm aluminium filter to attenuate harder X-rays. Camera binning  
218 was used to improve signal to noise ratios. For hard tissue staining, perinatal mice were scanned to  
219 produce 7.4um voxel size volumes using X-ray settings of 70kVp, 114uA and a 0.5 mm aluminium  
220 filter to attenuate harder X-rays. The specimens were analysed using Parallax Microview software  
221 package (Parallax Innovations Inc., Ilderton, ON Canada). Specimens were scanned using a Scanco  
222 μCT50 microcomputed tomographic scanner (Scanco, Brüttsellen, Switzerland). The specimens were  
223 immobilised in appropriately sized scanning tubes using cotton gauze.

224

#### 225 ***CRISPR/Cas9 knockouts in *Xenopus tropicalis****

226 The following non-overlapping single guide RNAs (sgRNAs) were designed to target *Xenopus*  
227 *tropicalis* *ctnnd1*: sgRNA1 - CTAGCtaatacactcactataGGAACGGGTGTGGGAGCCATgttttagagctagaa;  
228 sgRNA2 - CTAGCtaatacactcactataGGGGTGGTATCCCACGCAAGgttttagagctagaa. sgRNA1 targets exon  
229 3 and is thus predicted to disrupt isoform 1 only, while sgRNA2 targets exon 7 and is thus predicted  
230 to disrupt all four isoforms. Embryos were injected at the one or two cell stage and raised until  
231 indicated stages. For CRISPR/Cas9 experiments, statistical significance was defined as P<0.05 and  
232 analysed by chi-squared test or Fisher's exact test.

233

#### 234 **Results**

### 235 **Identification of CTNND1 variants**

236 Here, we identify 13 individuals with protein-truncating variants in *CTNND1*. Previously, all  
237 patients had undergone an array-based comparative genome hybridization analysis with normal  
238 results. A subset of patients had also been referred for other diagnostic tests, including 22q11  
239 deletion, Down syndrome, CHARGE syndrome (*CHD7* sequencing), Noonan syndrome (*PTPN11*  
240 sequencing) and other conditions, but with no definitive diagnoses. Exome sequencing of the  
241 patients revealed eight novel variants in *CTNND1*, including six confirmed *de novo* variants (in 7  
242 patients). Two individuals inherited their variant from affected parents while two other participants  
243 inherited a variant from a parent with a mild phenotype (Figure 1A). These truncating mutations  
244 included nonsense, splicing and frameshift variants (Table 1).

245 *CTNND1* variants identified could be grouped according to the overall structure of the  
246 protein (Figure 1B). One variant falling within the N-terminal regulatory region was identified in  
247 Patient 1. Patient 1 has a *de novo CTNND1* c.443\_444delTG (p.Val148Aspfs\*24) mutation in exon 6.  
248 Targeted sequencing for this variant was carried out on the affected daughter (Patient 2), which  
249 segregates with the phenotypes in the family.

250 Four variants fell within the armadillo repeats, which are predicted to be crucial for  
251 interactions with E-cadherin. Two unrelated individuals (Patients 3 and 4) both had a *de novo*  
252 mutation in *CTNND1*: c.1381C>T (p.Arg461\*) (Figure 1A-B). This variant results in a nonsense  
253 substitution and creates a stop codon in exon 7. In addition, Patient 3 had a rare variant in *CTNND1*,  
254 inherited paternally c.943C>T (p.Arg315Cys), which is present at a frequency of  $2 \times 10^{-4}$  in reference  
255 populations<sup>51</sup>. As the parent shares none of the phenotypes with the patient, this second variant is  
256 unlikely to be causative. Patient 5 had a *CTNND1* variant c.2389C>T (p.Arg797\*) on exon 15. A  
257 *CTNND1* frameshift variant c.1481\_1485del (p.Leu494Argfs\*5) in exon 8 was identified in a mother  
258 and child; both are affected (Patients 6 and 7, respectively). In the same exon, Patient 8 had a  
259 *CTNND1* variant c.1594del (p.Gly532Alafs\*6).

260 We found three variants affecting the C-terminal domain, present in five patients in three  
261 families. The variant c.2598\_2601dupTGAT (p.Ser868\*) was paternally inherited in a family with two  
262 affected siblings (Patients 9 and 10). The father is fit and healthy; however, his palate is narrow and  
263 high, and his nose is prominent. Patient 11 has a *de novo* CTNND1 variant at the splice acceptor site  
264 of exon 19 designated as c.2702-5A>G, which is predicted to create a cryptic splice site, leading to a  
265 premature termination codon at the start of exon 19. Finally, Patients 12 and 13 are monozygotic  
266 twins carrying a *de novo* frameshift variant in CTNND1: c.2737dupC (p.His913Profs\*3).

267

### 268 **Clinical presentation of patients with CTNND1 variants**

269 Clinical phenotypes are summarized in (Table 2), and further details can be found in (Table  
270 S1). Photographs from participants show a number of shared craniofacial and oral features (Figure 2  
271 and Figure 3, respectively) as well as other affected structures (eyes, ears and limbs (Figure S1)).  
272 Additional features including heart anomalies and neurodevelopmental conditions are noted in  
273 (Table 2 and Table S1).

274 Participants shared several distinctive eye features including short, up-slanted palpebral  
275 fissures (9/13), hooded eyelids (8/13), telecanthus (7/13), highly arched (8/13) and thin lateral  
276 eyebrows (8/13) and other eyelid anomalies such as nasolacrimal obstructions (1/13). These eye  
277 anomalies were clear from a young age (Figure S1A). A subset had ectropion (drooping lower eyelids,  
278 4/13) and distichiasis (double eyelashes, 4/13). Many individuals had wide nasal bridges (11/13) with  
279 broad nasal tips (7/13), choanal atresia (4/13), either unilateral or bilateral atresia; malar flattening  
280 (mid-face hypoplasia) (9/13); mandibular prognathism (5/13); thin upper lips (7/13) and auricular  
281 abnormalities (9/13), particularly low-set ears and overfolded helices (Figure S1B).

282 Phenotypes with high penetrance involved oropharyngeal abnormalities including cleft lip  
283 and/or palate (CLP) (8/13), high-arched palate (7/13) or a combination of cleft and high-arched  
284 palate (Figures 3A-3D). A range of cleft sub-types was seen (Table S1). In addition, one participant

285 had velopharyngeal insufficiency (VPI) and a bifid uvula. Of interest, three individuals presented with  
286 vocalization defects causing stridor and hoarseness or nasal speech.

287       Upon dental examination, all subjects were found to have intra-oral anomalies (Figure 3). In  
288 particular, congenital tooth agenesis (hypodontia) was frequently seen, with eight subjects missing  
289 between three and twelve adult teeth (Figure 3G-L; Table S2). Other anomalies included retained  
290 primary teeth and delayed eruption of the permanent teeth (6/13) (Table S1). Morphologic tooth  
291 anomalies were present, including diminutive permanent teeth/peg-shaped lateral incisors and  
292 fissured crowns of the permanent central and lateral incisors (Figures 3E-F; Table S1).

293       Beyond the craniofacial structures, the majority of the participants had limb and heart  
294 anomalies. Mild limb phenotypes (9/13) were present, including shorter fifth fingers, single  
295 transverse palmar crease, mild syndactyly between the 2,3 toes, sandal gaps and camptodactyly of  
296 the toes (Figure S1C). Congenital cardiac defects, which have not previously been associated with  
297 *CTNND1* variants, consistently occurred in our cohort. Six subjects had cardiovascular anomalies  
298 including tetralogy of Fallot, hypoplastic aortic arch, coarctation of the aorta, ventricular septal  
299 defect, atrial septal defect, mitral valve stenosis, patent ductus arteriosus and patent foramen ovale  
300 (Table 2 and Table S1). Finally, in addition to the craniofacial and cardiac anomalies, individuals  
301 presented with other phenotypes that added to the complexity of their conditions. Developmental  
302 delay and other neurodevelopmental problems were also observed (8/13). These often appeared  
303 from early toddler and school years and included mild learning difficulties, autism spectrum disorder,  
304 speech and language delay, and behavioral problems (Table S1). One individual was diagnosed with  
305 ovarian dysgerminoma stage III in the left ovary at the age of 12 years, which was treated with left  
306 oophorectomy followed by chemotherapy. Other infrequent anomalies included urogenital  
307 problems, scoliosis and partial agenesis of the corpus callosum (Table S1).

308

309 ***P120 is expressed during human embryonic development***

310 Although *P120* mRNA expression patterns have recently been documented during human  
311 and mouse palate development<sup>3</sup>, less is known about expression in the pharyngeal arch stages,  
312 which are likely to be important given the range of patient phenotypes. Therefore, we carried out  
313 mRNA *in situ* hybridization on human embryos using a probe that binds to all four *CTNND1* mRNA  
314 transcripts.

315 At Carnegie stage 13 (CS13), we found expression at multiple sites within the developing  
316 head, including the frontonasal processes, the forebrain, midbrain and rhombomeres (Figure 4B-4C).  
317 Robust expression was also detected in the maxillary and mandibular processes of the first  
318 pharyngeal arch (PA1), the second and third pharyngeal arches (PA2 and PA3, respectively) as well as  
319 in the proximal domains of the upper and lower limb buds (Figure 4A-4B). Signal was also weakly  
320 detected in the somites; however, strong expression was seen in the developing heart, trigeminal  
321 ganglion and the 10<sup>th</sup> cranial nerve (Figure 4A-4B).

322 By Carnegie stage 21, *CTNND1* mRNA was expressed in the brain (data not shown), tooth  
323 bud (Figure 4E), the epithelial lining of the tongue and oral cavity and in the tongue mesenchyme  
324 (Figure 4D). Expression was particularly strong in the intrinsic muscles of the tongue: the superior  
325 longitudinal and transversal muscles and in the extrinsic genioglossus muscle (Figure 4D). Moreover,  
326 expression was evident in the dorsal epithelial lining of the developing palatal shelves (Figure 4F). In  
327 the heart, *P120* expression was found in cardiomyocytes of the ventricular wall and interventricular  
328 septum, in addition to strong expression in the endocardium (Figure 4G). Expression was also found  
329 in the intrinsic epithelial lining of the stomach wall; both in the pyloric part of the stomach and in the  
330 inner walls of the stomach body, the pancreatic islets, the germinal center of the spleen, the  
331 epithelial lining of the bladder, hindgut and in the spinal cord and vertebral body (Figure S2).

332

### 333 ***Expression of phosphorylated p120-catenin predicts fusion of the palatal seam***

334 Because all of our participants had either cleft palate or associated palatal anomalies, we  
335 also assessed p120-catenin expression during palatal fusion in the mouse, which occurs from

336 embryonic day 12.5 (E12.5) to E15.5 (Figure 5A-5D). To examine this, we used two antibodies  
337 recognizing phosphorylated forms of p120-catenin: a tyrosine-phosphorylated form, or  
338 phosphorylation at serine 268 (pS-268), which is proposed to trigger disruption of epithelial  
339 cadherin-catenin complexes<sup>52,53</sup>. Neither of these forms of p120-catenin had been previously  
340 analyzed in the palate. In palatal cross-sections at E14.5, the medial epithelial seam (MES) is evident  
341 (Figure 5B), followed a few hours later with dissolution of the seam at E14.75 (Figure 5C). While E-  
342 cadherin is expressed as expected in the MES<sup>54</sup> (Figure 5F, J), the two forms of p120-catenin show  
343 very distinctive distributions. As the seam undergoes EMT, at E14.5, pS-268 is strongly expressed as  
344 predicted in cell-cell interfaces of the periderm layer along the medial seam, clearly co-localising  
345 with E-cadherin (Figure 5E-5F). As the seam degrades, E-cadherin expression is lost while p120-  
346 catenin expression remains (Figure 5G-5H, white arrowheads). To our surprise, we find phospho-  
347 tyrosine p120 staining in both the mesenchymal and the epithelial cells, with a clear enrichment  
348 marking the border between the epithelial and mesenchymal populations (Figure 5I-5J, pink  
349 arrowheads). This distribution appears unique to this stage of palate formation consistent with  
350 reports that p120-catenin is tyrosine phosphorylate in an EGFR-dependent manner<sup>55</sup>, and continues  
351 during degradation of the seam while E-cadherin expression decreases (Figure 5K-5L, pink  
352 arrowheads). As a control, in earlier stages (E11-12.5), the phospho-tyrosine expression is much  
353 lower and nearly identical to the pS-268 staining (data not shown).

354

### 355 ***Heterozygous loss of p120-catenin leads to structural changes in the laryngeal apparatus***

356 Some of our participants presented with anomalies associated with dysfunction of their  
357 velopharyngeal muscles and voice irregularities (Table S1 and Table 2), a phenotype described in  
358 patients with velocardiofacial syndrome<sup>56-58</sup>. Antibody staining confirmed presence of p120-catenin  
359 protein during development of the laryngeal and pharyngeal tissues in the mouse (Figure S3A). We  
360 then examined the laryngeal structures of mutant mice compared to their littermate controls at  
361 E16.5, P1 and P2.5 (Figure 6). To do this, we crossed a mouse carrying the ubiquitous  $\beta$ -actin::cre

362 driver with *Ctnnd1<sup>fl/fl</sup>* mice in order to generate heterozygous mutants<sup>59,60</sup> (Figure 6C, 6H, 6M, 6R).  
363 Because we previously showed that the vocal ligaments originated from the neural crest<sup>61</sup>, we also  
364 generated tissue-specific *Ctnnd1* heterozygotes using the neural crest specific driver, *Wnt1::cre*<sup>62</sup>  
365 (Figure 6E, 6J, 6O). We found identical laryngeal anomalies in the heterozygous mutants in both  
366 mouse crosses, confirming the neural crest-specificity of these phenotypes.

367 Specifically, in control *Ctnnd1<sup>fl/+</sup>* mice, the palatopharyngeus (PLP) muscle, which elevates  
368 the larynx, is well defined and runs uniformly perpendicular to the epiglottis thereby attaching to  
369 the superior pharyngeal constrictor muscle (SPC) on either side (Figure 6A, 6B and 6D). On the other  
370 hand, the PLP and the SPC were both severely disorganized in both sets of heterozygous mice with  
371 an apparent increase in the cranio-caudal thickness of the PLP muscle (Figure 6C and 6E). Second, a  
372 striking phenotype known as laryngeal webbing was observed (compare controls, Figure 6G, 6I, 6Q  
373 to mutants Figure 6H, 6J, 6R). Typically, the bilateral vocal cords are parallel and meet at the midline  
374 (Figure 6F-6G, with inset schematized and shown in 6P and 6Q). The outer layer of the vocal fold is  
375 made of an epithelium that encapsulates the lamina propria comprising the vocal ligaments (Figure  
376 6P and 6Q). These two layers function as the vibratory components for phonation and oscillation.  
377 Instead, in heterozygous mutant mice, the vocal ligaments show only a brief contact point between  
378 the opposing epithelia (Figure 6H, with inset schematized and shown in 6R and 6S). The vocal cords  
379 are also thinner, lacking the lamina propria (Figure 6R). Laryngeal webbing was also seen in the  
380 *Wnt1::cre* heterozygotes (Figure 6J) compared to their littermate controls (Figure 6I).

381 While the vestibular folds were well demarcated and the ligaments within them clearly  
382 defined in controls (Figure 6G), the vestibular folds in the heterozygous mice were ectopically fused  
383 and the ligaments sparse and dispersed (Figure 6H). Caudally, where the vestibular folds surrounded  
384 the normal corniculate cartilage (COC) (Figure 6 K, L); the folds have separated in the *Ctnnd1*  
385 heterozygotes, albeit hypoplastic (Figure 6M). Similarly, the COC appeared hypoplastic and devoid of  
386 the underlying lamina propria (Figure 6M). Finally, in mutants, the muscles were ectopically fused to  
387 the levator veli palatini muscles, which were then fused to the cranial base (Figure 6M). This, in turn,

388 gave the impression of a high-arched epiglottal area; a defect also found in the *Wnt1::cre*  
389 heterozygous mutants (Figure 6O).

390 We also explored other craniofacial phenotypes in our heterozygous mouse model.  
391 Compared to their littermate controls (Figure S3B, a-e), mutant mice did not show any cleft lip  
392 (Figure S3B, f), face or limb dysmorphologies (Figure S3B, f-h) or cleft palate (Figure S3B, i) (n=12).  
393 This was confirmed by micro-computed tomography ( $\mu$ CT) to check for associated bony defects  
394 (n=6) (Figure S3B, j).

395

### 396 ***P120-catenin isoform 1 function is required in multiple organ systems***

397 While genetic mutation of *p120-catenin* in mouse models revealed a role for the neural crest  
398 in oropharyngeal development, analysis of multi-system involvement of p120-catenin was difficult  
399 due to embryonic lethality of the homozygous null mice<sup>5,9</sup>. We therefore turned to the frog *Xenopus*,  
400 where *in vivo* function of p120-catenin has been well studied<sup>11,12,63</sup>. Previous analyses of p120-  
401 catenin requirements were mainly performed with antisense morpholino oligonucleotide (MO)  
402 knockdowns, which transiently prevent protein translation<sup>11</sup>. Instead, to create genetic mutants, we  
403 used CRISPR/Cas9 approaches, allowing us to specifically delete different p120-catenin isoforms<sup>64</sup>.  
404 As noted in the introduction, isoform 1 (full length at 968 amino acids (aa)) is most abundant in  
405 mesenchymal cells, while isoform 3 (start at aa 102) is preferentially expressed in epithelial cells<sup>27-30</sup>.  
406 Isoforms 2 and 4, which start at 55 aa and 324 aa, respectively, are less well characterized.

407 Embryos were injected at the one cell stage with single guide RNAs (sgRNAs) targeting either  
408 of two coding exons, exon 3 or exon 7 (sgRNA1 and sgRNA2 respectively, Figure 7A). Disruptions in  
409 exon 3 are predicted to only affect isoform 1, while sgRNA2 targeting exon 7 disrupt all four isoforms.

410 When embryos were scored at gastrula stages following sgRNA1 injections, disrupted or  
411 delayed blastopore closure was evident (n=30/42 vs. 2/30 in the controls) (Figure 7B). Furthermore,  
412 we noted severe early lethality (Figure 7D), especially using sgRNA2 which blocked all isoforms



413 (Figure 7D). Notably, by neurula stages the majority of these mutants died due to a loss of integrity  
414 in the epithelium (data not shown).

415 Since the most well-established epithelial role for p120-catenin is in complex with E-  
416 cadherin at cell-cell junctions, we first examined E-cadherin localization in the neurectoderm at  
417 stage 11, as gastrulation was concluding. Indeed, in uninjected controls, high levels of p120-catenin  
418 and E-cadherin were found co-localized at the cell interface (Figure 7C, a-d). E-cadherin is expressed  
419 throughout the cell membrane (Figure 7C, b), whereas p120-catenin, though localized to the cell  
420 membrane, appears distributed in puncta (Figure 7C, a). Upon p120-catenin deletion, the expression  
421 levels of endogenous E-cadherin in the epithelial cells was diminished particularly at the interface  
422 between the cells, leaving only spot-like localization of both proteins at the tricellular junctions of  
423 these epithelial cells (Figure 7C, e-h). The residual expression of p120-catenin may be due to  
424 maternal loading of the protein, as the CRISPRs should only affect zygotic transcription, or due to  
425 mosaicism of the CRISPR deletion.

426 As the sgRNA2 CRISPR was predicted to disrupt all four isoforms and led to severe lethality  
427 by neurula stages, the majority of analyses were performed using the sgRNA1 CRISPR, which is  
428 predicted to disrupt the predominantly mesenchymal isoform 1. A proportion of the knockout  
429 animals survived past the neurula stages, possibly due to mosaicism, and were examined at stage 46  
430 to determine whether craniofacial and organ development had occurred normally. We observed  
431 obvious craniofacial defects in the CRISPR mutants, including a reduction in the width and height of  
432 the head (Figure 7E, l-n), a hypoplastic mouth opening (Figure 7E, m), delayed breakdown of the  
433 cement gland (Figure 7E, l-m), heart and gut looping anomalies (Figure 7E, n). Following on from the  
434 disorganization of the laryngeal muscles seen in the mouse mutants (Figure 6), antibody staining  
435 against Pax2 was used to label the muscle fibers while anti-collagen 2 (col2) antibody labelled  
436 craniofacial cartilages in the mutants (Figure 8A, a-h). In control animals, the muscle fibers were  
437 well-organised and straight while in the mutants, the muscle morphology appeared disorganized,  
438 particularly the rectus abdominus muscle, with muscle striations being replaced by irregularly

439 shaped fibers (Figure 8A, f-g). Consistent with previous observations (Figure 7), craniofacial  
440 cartilages were hypomorphic, and compacted both in the anterior-posterior and dorsal-ventral axes  
441 (Figure 8A, a and e). However, morphology of the chondrocytes appeared normal (Figure 8A, d and  
442 h).

443 Finally, since the participants (6/13) had a high frequency of congenital heart defects and  
444 because p120 is strongly expressed in the heart of human, mouse and frog embryos, we examined  
445 the hearts in the CRISPR-knockout tadpoles. Notably, the strong expression of p120 seen in the  
446 different heart chambers in the control tadpoles was lost when p120 was knocked down (Figure 8B,  
447 p). The majority of mutant tadpoles had heart anomalies including heart-looping defects (Figure 7E,  
448 n; Figure 8B, n). Notably, E-cadherin is not expressed in the normal heart or the muscles (Figure 8B,  
449 l), suggesting that the heart and muscle phenotypes may be manifestations of E-cadherin  
450 independent functions of p120.

451

## 452 Discussion

453 This work expands upon the spectrum of abnormalities associated with *CTNND1* variants  
454 beyond non-syndromic cleft lip/palate (CLP) and BCD<sup>1-3</sup>. Most notably, we describe in detail  
455 characteristic craniofacial features including choanal atresia and unusual patterns of hypodontia as  
456 well as heart, limb, laryngeal and neurodevelopmental anomalies. We find expression of *CTNND1*  
457 mRNA during development of the pharyngeal arches in human embryos and we define the profile of  
458 two phosphorylated forms of p120 in the mouse palate. Finally, genetic approaches in mouse and  
459 *Xenopus* demonstrated novel roles for *CTNND1* in the oropharynx, craniofacial cartilages and in the  
460 heart. Thus, our data implicate *CTNND1* variants as causative of a broad-spectrum syndrome that  
461 overlaps with DiGeorge velocardiofacial syndrome as well as other disorders of craniofacial  
462 development such as CHARGE and Burn McKeown syndromes<sup>65-68</sup>. All of these syndromes could be  
463 collectively considered to be neurocristopathies. Notably, the neural crest specific disruption of  
464 *CTNND1* in our animal models supports this role for *CTNND1* as a candidate neurocristopathy gene

465 and we suggest that these newly identified variants likely highlight both epithelial and mesenchymal  
466 roles for p120-catenin.

467 Prior to our study, the majority of the participants did not have a recognizable or a  
468 diagnosed condition when they were recruited. Here, we demonstrate that they collectively share  
469 consistent characteristic phenotypic features that suggest that mutations in *CTNND1* may lead to a  
470 much broader phenotypic spectrum than previously described<sup>1,2</sup>. For instance, low set ears were  
471 reported in one case of BCD by Kievit and colleagues<sup>1</sup>; we find multiple participants with auricular  
472 anomalies particularly the low-set ears and over-folded helices (Figure S1B, Table S1). Similarly,  
473 syndactyly was reported in one of the *CTNND1* patients described in Ghoumid et al.<sup>2</sup>, and  
474 clinodactyly (one patient) and camptodactyly (two patients) were reported by Kievit et al<sup>1</sup>. Again, we  
475 find limb anomalies consistently associated with *CTNND1* variation (Figure S1C, Table S1). The  
476 cardinal features of BCD include ectropion of the lower eyelids, euryblepharon and  
477 lagophthalmos<sup>69,70</sup>; while five of our patients showed these eye manifestations (Figure 2; Table 2), we  
478 also found short up-slanting palpebral fissures, hooded eyelids, high arched eyebrows and  
479 telecanthus (Figure S1A, Table 2 and Table S1). As BCD is associated with both *CTNND1* and *CDH1* (E-  
480 cadherin) variants, some of these phenotypes may represent distinctive functions of the E-cadherin-  
481 p120 complex; the majority of these functions could be attributed to a role for the cadherin-catenin  
482 in epithelia<sup>71</sup>.

483 Of note, eight individuals had severe hypodontia, including missing permanent canines and  
484 first permanent molars, even in those without cleft lip/palate. Thus, missing canines and molars  
485 could be classified as a microform cleft anomaly, especially when found in association with high-  
486 arched palate<sup>72</sup> (Figure 3, I and K; Table S2).

487 Beyond the known phenotypes associated with *CTNND1* and *CDH1*, we note the novel  
488 phenotypes seen in our patients, which include the heart anomalies and behavioral disorders. These  
489 have not been reported previously in patients with a BCD diagnosis. Nevertheless, our findings  
490 suggest that both *CTNND1* and *CDH1* should be tested in patients with congenital orofacial and

491 cardiac anomalies. A key finding was choanal atresia in four individuals; given the rarity of this  
492 anomaly, both *CTNND1* and *CDH1* should be considered during genetic profiling of patients with this  
493 anomaly, in addition to CHARGE and other syndromes noted above. Indeed, Nishi et al. (2016)  
494 reported cleft lip, right choanal atresia, a congenital cardiac anomaly (tetralogy of Fallot), agenesis of  
495 the corpus callosum, upslanted palpebral fissures and ear anomalies in a patient with *CDH1*  
496 mutation<sup>73</sup>; however, at the time, this was not diagnosed as BCD.

497         While all of the variants found in the present study resulted in truncations of p120-catenin,  
498 they fell broadly into three distinct groups: those falling within the N-terminal regulatory region  
499 (p.Val148Aspfs\*24), those disrupting the armadillo repeat region and presumably subsequent  
500 interactions with E-cadherin (e.g., p.Arg461\*, p.Arg797\*, p.Leu494Argfs\*5 and p.GLy532Alafs\*6),  
501 and those falling in the C-terminal domain (p.Ser868\*, the splice variant c.2702-5A>G and  
502 p.His913Profs\*3). Interestingly, those probands with C-terminal truncations had the most complete  
503 cleft lip and palate phenotypes. This was consistent with previous reports by Kievit et al.<sup>1</sup> who  
504 reported a nonsense mutation (p.Trp830\*) and Cox et al.<sup>3</sup> who reported p.Arg852\* and a splice site  
505 mutation (c.2417+G>T)<sup>3</sup>. As these C-terminal truncations would all be predicted to retain E-cadherin  
506 binding, but lose crucial RhoGAP interactions<sup>24</sup>, one might hypothesize that a mutation in this region  
507 prevents p120 clearing from the epithelial complex, which is necessary for seam dissolution during  
508 palate closure. Therefore, future analyses should focus on whether these C-terminal truncations are  
509 acting in a dominant-negative manner, and preventing clearance of E-cadherin from the seam.

510         With regards to non-epithelial functions of p120, some of the phenotypes that this study,  
511 and others, have reported, could be explained by the known interactions of p120 in the Wnt  
512 signaling pathway<sup>20</sup>. Epithelial-specific knockouts of p120 (using a *keratin-14* promoter) did not show  
513 tooth agenesis<sup>10</sup>, suggesting that the tooth anomalies in our patients do not arise from the epithelial  
514 functions of p120. In support of this, two key genes implicated in tooth agenesis are the Wnt ligand,  
515 *Wnt10A* and a Wnt target gene *Axin2*<sup>74-78;78-84</sup>. The Wnt signaling pathway may also explain the  
516 laryngeal findings (Figure 6), as knockout of the Wnt transducer  $\beta$ -catenin is also known to lead to

517 similar vocal fold anomalies<sup>85</sup> as those seen in our neural crest specific *p120-catenin* heterozygotes  
518 (Figure 6). Furthermore, knockout of the mesenchymal form of p120 (isoform 1) in *Xenopus* (Figure 7  
519 and Figure 8), confirm prior studies on p120-catenin in the neural crest, where the p120-catenin  
520 association with Wnt signaling is well-established<sup>32,86,87</sup>. Thus, we hypothesize that a subset of p120  
521 phenotypes can also be attributed to Wnt perturbation in the neural crest (Figure 9). The heart  
522 defects seen in our patients could also be attributed to a failure in neural crest development, which  
523 is known to be crucial for development of the septum and valves<sup>88-92</sup>.

524 In addition to the phenotypes shared commonly across our cohort, some participants in this  
525 study had scoliosis, and one family reported two deceased children, who had bifid uvula, congenital  
526 cardiac disease (VSD, PDS), eye anomalies, developmental delay and chronic bowel immotility and  
527 gastroesophageal reflux disease; however, no genetic testing had been carried out. One patient  
528 presented at a young age with an ovarian dysgerminoma. To our knowledge, this is the first patient  
529 with a *CTNND1* variant associated with an early onset cancer, though p120 has been associated with  
530 cancer and tumorigenesis<sup>23-25,93,94</sup>. Finally, a number of patients reported in DECIPHER have copy  
531 number variants (CNV) affecting *CTNND1* (data not shown). Interestingly, both deletions and  
532 duplications have been associated with partially overlapping phenotypes. For instance, two patients  
533 with a deletion of less than 4MB had anomalies including bulbous nose, limb anomalies, delayed  
534 speech and language development, intellectual disability, nasal speech, ventricular septal defect,  
535 and cleft lip.

536 In summary, we demonstrate for the first time that p120 is not only involved in human  
537 conditions involving epithelial integrity, most likely caused by aberrant E-cadherin/p120 interactions,  
538 but also in other important intracellular functions (Figure 9). We conclude that *CTNND1*-related  
539 disorders span a spectrum of phenotypes ranging from multi-system involvement, to non-syndromic  
540 clefting. While further studies will be necessary to definitively understand the phenotype-genotype  
541 correlations, *CTNND1*, and perhaps *CDH1*, should be considered when patients present with  
542 characteristic craniofacial anomalies, congenital cardiac defects and neurodevelopmental disorders.

543

544

545 **Declarations:** SAL is part owner of Qiyas Higher Health, a startup company unrelated to this work.

546

547 **Acknowledgements:** We thank the patients and their families for their kind co-operation. We are

548 grateful to the South Thames Cleft Team for their support, and to the Liu lab and colleagues in CCRB,

549 especially Angela Gates, for support and feedback. The Human Developmental Biology Resource,

550 which provided human samples, is funded by Joint MRC/Wellcome Trust (grant # 099175/Z/12/Z).

551 This study makes use of **DECIPHER**, which is funded by the Wellcome Trust. The DDD study presents

552 independent research commissioned by the Health Innovation Challenge Fund [grant number HICF-

553 1009-003], a parallel funding partnership between Wellcome and the Department of Health, and the

554 Wellcome Sanger Institute [grant number WT098051]. The views expressed in this publication are

555 those of the author(s) and not necessarily those of Wellcome or the Department of Health. The

556 research team acknowledges the support of the National Institute for Health Research, through the

557 Comprehensive Clinical Research Network. *Xenopus* experiments were additionally supported by

558 the European Xenopus Resource Centre, Portsmouth UK, the National Xenopus Resource USA and

559 Xenbase. Work in the Liu lab is funded by BBSRC (KJL), British Heart Foundation (KJL/JG), the MRC

560 (KJL), the Faculty of Dental Surgery Royal College of Surgeons of England - British Society of

561 Paediatric Dentistry (FDS RCSEng-BSPD) Small Grant (RA/MTH/KJL), KSA (RA) and NIH/NIDDK

562 DK099478 (DKM).

563

564

565

566 **FIGURE LEGENDS:**

567 **Figure 1. Pedigrees and identification of CTNND1 variants.** [A] Pedigrees of individuals with  
568 identified variants. Filled boxes indicate affected individuals demonstrating collective phenotypes  
569 described in our cohort. A blank box with a vertical black line indicates an asymptomatic carrier  
570 (clinically unaffected). A box with an oblique line indicates a deceased individual. Lightly shaded  
571 boxes indicate individuals affected with one or more of the conditions described. [B] Schematic  
572 representation of the human p120-catenin protein structure and its domains. The variants described  
573 in our cohort are shown above the protein with a dark gray arrow. The light gray arrow with the  
574 (p.Arg315Cys) variant indicates the other *CTNND1* mutation found in Patient 3 which was inherited  
575 from the unaffected father [A]. Arrows in blue, pink and brown represent the variants and their  
576 locations reported in Ghoumid et al.<sup>2</sup>, Kievit et al.<sup>1</sup> and Cox et al.<sup>3</sup>, respectively.

577

578 **Figure 2. Clinical presentation of individuals with a CTNND1 mutation.** Facial photos (frontal and  
579 profile) show craniofacial features of patients. Note the narrow up-slanting palpebral fissures in  
580 Patients 3,4, 7-13; the hooded eyelids in patients 3, 4, 8-13; telecanthus in Patients 3,4,9-13; the  
581 high arched eyebrows in patients 1, 2, 6-8, 11-13 and the thin lateral eyebrows in Patients 1,5-11.  
582 Patients 1 and 4 had missing eyelashes medially from the inner canthus; Patients 1,2, 5 and 7 have  
583 distichiasis (double row of lashes), and mild ectropion of the lower eyelids were seen in Patients 1,5  
584 and 6. As evident, no patient shows signs of hair sparsity. Most patients had wide nasal bridges with  
585 broad nasal tips while Patients 1,2, 8 and 11 were also diagnosed with congenital choanal atresia.  
586 Patients 1,2,7-9, 11 and 12 showed thin upper lips and while mid-face hypoplasia was observed,  
587 Patients 1,3,8,11 and 13 also had mandibular prognathism. Scars from cleft lip operations are seen in  
588 Patients 7, 9-13. Patient 3 was born with a submucous cleft palate, a bifid uvula and velopharyngeal  
589 insufficiency.

590

591 **Figure Supplemental 1. Clinical presentation of individuals with a CTNND1 mutation.**

592 [A] The eye phenotypes of the narrow palpebral fissures, the hooded eyelids and highly arched, thin  
593 lateral eyebrows were evident from a young age. [B] Ear anomalies included: low-set ears,  
594 sometimes asymmetric and/or small; overfolded helices of the external ears; a pre-auricular pit was  
595 also seen in one of the patients (data not shown). [C] Upper limb anomalies included: slightly shorter  
596 5<sup>th</sup> fingers as seen in Patients 3, 12 and 13; and a single transverse palmar crease on the right hand  
597 seen in both Patients 3 and 8. Lower limb anomalies included: 2,3-cutaneous syndactyly of the feet;  
598 sandal gaps and camptodactyly of the 2<sup>nd</sup> toe as seen in Patients 12 and 13; a longer 4<sup>th</sup> toe in  
599 Patient 6 and short toes in Patient 7.

600

601 **Figure 3. Dental manifestations and intra-oral phenotypes of patients with a CTNND1 mutation.**

602 [A-D] A high-arched palate was seen, shown are palates of Patients 1, 2, 3 and 8. [E-F] Abnormalities  
603 in the morphology of the dentition included: fissured incisors in Patient 11 [E, black arrowheads] and  
604 rotation of the incisors from the normal alignment shown in the non-cleft Patient 1 [F, black  
605 arrowhead]. [G-H] Hypodontia (tooth agenesis) was a common phenotype, indicated by the black  
606 asterisk. Black arrowheads indicate retained primary teeth. Patient 3 also has a diminutive upper left  
607 lateral incisor [G, yellow arrowhead] and wide inter-dental spacing [G', white arrowheads]. [I-L]  
608 Dental orthopantomograms (OPGs); missing teeth are indicated by white asterisks; diminutive teeth by  
609 yellow, macrodont teeth by magenta and supernumerary teeth by blue arrowheads, respectively. [I]  
610 OPG of Patient 8 at age 11, shows 8 missing permanent teeth (white asterisks) and shows the  
611 eruption of the second permanent molars (white arrowheads) in place of the missing first  
612 permanent molars. Also shown are diminutive upper right and left lateral incisors (peg-shaped)  
613 (yellow arrowheads), and a macrodont lower left second primary molar (magenta arrowhead). [J]  
614 OPG of Patient 11, at the age of 14, shows 3 missing permanent teeth (white asterisks), an ectopic  
615 maxillary left permanent canine and rotated maxillary centrals and left lateral incisors and  
616 dilacerated roots of the lower second permanent molars. [K] OPG of Patient 2, taken at 4 years,  
617 shows missing teeth including a missing lower left first permanent molar (white asterisks); a



618 reported macrodont upper left primary canine (magenta arrowhead) with an underlying missing  
619 successor (white asterisk); a macrodont lower left second primary molar (magenta arrowhead) and a  
620 supernumerary tooth (blue arrowhead). [L] OPG for Patient 13, taken at 7.5 years, confirms absence  
621 of the upper left permanent lateral incisor and possibly the lower second permanent premolars.

622

623 **Figure 4. P120-catenin is expressed during relevant stages of human embryonic development.**

624 *CTNND1* mRNA *in situ* hybridization at human Carnegie stages 13 (CS13) [A-C] and 21 [D-G]. [A] Right  
625 lateral view of a CS13 human embryo, *CTNND1* mRNA is strongly expressed in the head in all three  
626 pharyngeal arches (PA1, PA2, PA3) and limb buds. Expression is specifically strong around the nasal  
627 placode and the maxillary and mandibular prominences. [B] Left lateral view, P120 is strongly  
628 expressed in the developing heart, frontonasal process, the trigeminal ganglion and the tenth cranial  
629 nerve. [C] P120 is ubiquitously expressed in the developing brain region in the rhombomeres, the  
630 forebrain and midbrain. [D-G] Coronal section through the head of a CS21 human embryo through a  
631 mid-palatal plane. [D] Strong expression is seen in the intrinsic muscles of the tongue: the superior  
632 longitudinal (magenta arrowhead), the transversal muscles of the tongue (black arrowhead) and the  
633 extrinsic genioglossus muscle (blue arrowhead). [E] *CTNND1* mRNA is strongly expressed in the  
634 epithelium of the developing tooth bud. [F] *CTNND1* is expressed on the dorsal epithelium of the  
635 palatal shelf (arrowhead) and in the epithelium of the tongue. [G] Expression is seen in the  
636 cardiomyocytes of the ventricular wall and the interventricular septum and in the cells of the  
637 endocardium (arrowhead). Scale bars = 100µm. Abbreviations: PA1, first pharyngeal arch; PA2,  
638 second pharyngeal arch; PA3, third pharyngeal arch; Tg, trigeminal ganglion; Mx, maxillary process;  
639 Md, mandibular process; CN X, tenth cranial nerve; ULB, upper limb bud; S, somites; LLB, lower limb  
640 bud; NP, nasal placode; H, heart, FNP, frontonasal process; Tb, mandibular tooth bud; PS, palatal  
641 shelf; T, tongue; IVS, interventricular septum; VW, ventricular wall.

642

643 **Figure Supplemental 2. *CTNND1* is expressed during relevant stages of human embryonic**  
644 **development.**

645 [A] Coronal cross-section through the torso at CS21. [B] *CTNND1* is expressed in the columnar  
646 epithelial lining of the stomach wall and continues through the pyloric part of the stomach. [C]  
647 Expression is seen in the islet of Langerhans in the pancreas. [D] Expression in the germinal center of  
648 the spleen. [E-G] Progressing caudally through the pelvis, *CTNND1* is expressed in the epithelial lining  
649 of the bladder [E], the rectum/hindgut [F], the spinal cord and vertebral body (VB) [G].

650

651 **Figure 5. Expression of phosphorylated p120-catenin predicts fusion of the palatal seam.**

652 [A-L] All images are coronal sections of CD1 wild-type murine embryos at consecutive stages of  
653 palatal development. [A-D] Hematoxylin and eosin (H&E) staining illustrates successive stages of  
654 palatogenesis from embryonic day (E) 12.5 to E15.5. [B] At E14.5, following horizontal elevation, the  
655 opposing palatal shelves (blue arrows) meet and adhere to form the medial epithelial seam (MES).  
656 [C] EMT occurs at E14.75 when the MES breaks down, forming epithelial islands (blue arrowhead);  
657 the nasal and oral epithelial triangles form (yellow arrows). [D] At E15.5 palatal shelves are fused.  
658 Red box in [B] marks the regions shown in [E-F, I-J]. Red box in [C] marks the regions shown in [G-H,  
659 K-L]. [E-L] Immunofluorescent staining for either pS-268 or p-tyrosine p120-catenin antibodies  
660 (green) shown independently in [E, G, I, K], or in a merge with E-cadherin antibody staining (red) and  
661 DNA/DAPI stain (blue) [F, H, J, L].

662 [E-F, I-J] At E14.5, both forms of p120-catenin are expressed, with pS-268 strongly expressed in the  
663 periderm at the midline seam co-localizing with E-cadherin [E-F], while p-tyrosine clearly enriched in  
664 the area marking the border between the epithelial and mesenchymal populations [I-J, pink  
665 arrowheads].

666 [G-H, K-L] At E14.75, pS-268 p120-catenin is strongly expressed in the epithelial islands and the oral  
667 and nasal epithelial triangles; this is co-localised with E-cadherin during EMT and endocytosis while  
668 p120-catenin expression remains in some areas [H, white arrowheads]. In contrast, p-tyrosine p120-

669 catenin expression surrounds E-cadherin positive epithelial islands, while E-cadherin expression has  
670 disappeared in the intervening mesenchymal cells (L, pink arrowheads). Scale bars = 50µm.  
671 Abbreviations: T, tongue; PS, palatal shelf.

672

673 **Figure 6. Heterozygous loss of p120-catenin leads to structural changes in the laryngeal apparatus.**

674 **[A-O] Progression of the pharyngeal and laryngeal anomalies**

675 [A, F, K] Schematics show the organization of the wildtype oropharynx from the more rostral (A) to  
676 caudal (K) planes. Haematoxylin and eosin (H&E) staining of coronal sections through control [B, G,  
677 L: *Ctnnd1<sup>fl/+</sup>*] and heterozygous mutants [C, H, M: *β-actin::cre/+; Ctnnd1<sup>fl/+</sup>*] littermate at postnatal  
678 stage (P1).

679 [B-C] The SPC (blue arrowhead) and PLP (red arrowhead) in mutants are disorganized with an  
680 increased thickness in the PLP cranio-caudally [C] as compared to the controls [B]. [G-H] The FVC  
681 (vestibular folds) are well-defined in the controls with abundant ligaments [G, red arrowhead]. The  
682 FVC are fused in the mutant mice [H, black arrowhead] with ill-defined vestibular ligaments (H, red  
683 arrowhead). [L-M] The muscle attachments (blue arrowheads) superior to the FVC (black arrowhead)  
684 are well organized bilaterally in the controls surrounding the COC [L]. Caudally, when the FVC  
685 separated in the mutants it appeared hypoplastic (black arrowhead) as did the COC. The muscles  
686 (blue arrowheads) were ectopically fused to the LVP, producing an appearance of a 'high-arched'  
687 epiglottal area [M, orange hollow arrowhead].

688 **[D-E, I-J, N-O] Neural crest specific mutants showed comparable laryngeal phenotype.**

689 Microcomputed tomographic (µCT) soft tissue scans of E16.5 control [D, I, N: *Ctnnd1<sup>fl/+</sup>*] or neural-  
690 crest specific [E, J, O: *Wnt1::cre/+; Ctnnd1<sup>fl/+</sup>*] heterozygous mutant littermates. [D-E] Compare the  
691 PLP in control [D] to the very thick PLP muscle seen in mutant [E, red arrowheads]. Compare the SPC  
692 in control [D] to the disorganized and hypoplastic SPC muscles seen in mutants [E, blue arrowheads].  
693 [I-J] Laryngeal webbing was observed in mutant TVF [J, yellow arrowhead] compared to parallel TVF  
694 in control littermate [I, yellow arrowhead]. [N-O] Note aberrant muscle attachments (blue

695 arrowheads) in [O] compared to control [N]. Control [N] epiglottal region compared to the high-  
696 arched epiglottal area observed in mutant littermate [O, orange hollow arrowhead].

697 **[P-S] The laryngeal webbing phenotype.**

698 [P and S] Schematic representations of the wild-type [P] and mutant [S] anatomy at the vocal folds  
699 (TVF) from yellow-boxed insets in [G] and [H], respectively.

700 [Q-R] H&E staining of coronal sections through control [Q: *Ctnnd1<sup>fl/+</sup>*] and heterozygous mutant [R:  
701 *β-actin::cre/+;Ctnnd1<sup>fl/+</sup>*] littermate at P1.

702 [Q] In controls, well-defined vocal ligaments (VL) run parallel to the true vocal fold/cords (TVF).  
703 Underlying, the vocalis muscle (VM) and the thyroarytenoid muscle (TAM) are clearly attached and  
704 well-organised. [R] Laryngeal webbing is seen in the heterozygous mutant mice, where the vocal  
705 ligaments (VL) accumulate at a thin contact point (black arrowhead) thus perturbing the correct  
706 muscle attachments of the VM and TAM.

707 Scale bars = 100µm. Abbreviations: SPC, Superior Pharyngeal Constrictor; PLP, Palatopharyngeus  
708 Muscle; TAM, Thyroarytenoid Muscle; VM, Vocalis Muscle; LGF; HB, Hyoid Bone; Epi, Epiglottis; OB,  
709 Occipital Bone; LVP, Levator Veli Palatini Muscle; AEF, Aryepiglottic Fold; TVF, True Vocal Fold; VL,  
710 Vocal Ligament; FVC, False Vocal Cord; CC, Cricoid Cartilage; TC, Thyroid Cartilage; AC, Arytenoid  
711 Cartilage; COC, Corniculate Cartilage.

712

713 **Figure Supplemental 3. Mouse p120-catenin is expressed in the epithelial and mesenchymal**  
714 **compartments of the laryngeal and pharyngeal apparatuses.**

715 [A] Immunohistochemistry using the anti-phosphotyrosine p120-catenin antibody on sagittal  
716 sections through wild-type mice at E13.5 (a-a') or E15.5 (b-b'). [a, b] Positive staining is seen in the  
717 epiglottis, esophagus and the larynx. [A] (a', b') Insets from (a and b, respectively). Muscles that  
718 express p120-catenin in the laryngeal and pharyngeal apparatuses are shown (pink arrowheads).

719 Abbreviations: E, epiglottis; Oe, entrance to oesophagus; L, laryngeal auditus; H, heart; SP, soft  
720 palate; TC, thyroid cartilage; CC, cricoid cartilage; T, tongue; Tr, trachea

721 **Heterozygosity in *p120-catenin* leads to normal facial and oral phenotypes.**

722 [B] Shown are postnatal P2.5 mice. Heterozygous mutant  $\beta$ -actin::cre/+;Ctnnd1<sup>fl/+</sup> mice do not  
723 exhibit facial or lip anomalies (f-g) and are comparable to littermate controls (a-b). [B] (c, h) No limb  
724 anomalies are observed. [B] (d, i) Postnatal P1 mice. Intra-oral views of the palate of wild-type (d)  
725 and heterozygous mutant littermate (i), cleft palate defects were not observed. [B] (e, j)  
726 Microcomputed tomography ( $\mu$ CT) scans showed normal palates in P2.5 control (e) and  
727 heterozygous mutant littermate (j).

728

729

730 **Figure 7. Ctnnd1 knockouts in *Xenopus* give rise to craniofacial and heart defects.**

731 [A] Embryos were injected at the one cell stage with single guide RNAs (sgRNA), sgRNA1 and sgRNA2  
732 targeting exons 3 and 7, respectively. [B] Ventral view showing blastopores at stage 11. Embryos  
733 injected with sgRNA1 had delayed blastopore closure (bottom row) compared to un-injected  
734 controls (UIC) (top row). The bar chart shows quantitation. Scale bars = 100 $\mu$ m.

735 [C] Confocal sections through the apical surface of ectodermal cells at stage 11 of embryos injected  
736 with sgRNA1 (e-h) and UICs (a-d). [C] (a-d) p120-catenin (a, green) is expressed in puncta at the cell  
737 membranes. E-cadherin (b, red) is expressed more evenly through the cell membranes. Both are  
738 colocalized at the cell-cell interface (c, d). Endogenous levels of p120-catenin and E-cadherin are  
739 diminished at the cell-cell interface in the sgRNA1-injected embryos (e-f). Residual p120-catenin and  
740 E-cadherin are seen in a spot-like pattern, only at the tricellular junctions (e-h, white arrowheads).

741 [D] p120-catenin depletion led to lethality in embryos by the neurula stage.

742 [E] Stage 46 tadpoles. [E] (i, l) Lateral views show a flattened profile in *p120* CRISPR tadpoles (l)  
743 compared to UICs (i). [E] (j, m) Frontal views showing a reduction in the size of mouth opening and a  
744 persistent cement gland (white arrowhead) in *p120* CRISPR tadpoles (m) compared to UICs (j). [E] (k,  
745 n) Ventral views showing a reduction in the size of craniofacial cartilages, altered cardiac looping  
746 (black-dashed outline) and altered gut coiling (yellow arrowhead) in *p120* CRISPR tadpoles (n)

747 compared to UICs (k). Quantification of craniofacial defects in UIC and p120 depleted tadpoles. Scale  
748 bars = 100 $\mu$ m. sgRNA, single guide RNA; UIC, un-injected control; \*\*\*\*p<0.0001; \*\*\*p<0.001.

749

750 **Figure 8. *Ctnnd1* knockouts in *Xenopus* give rise to altered morphogenesis of the muscles and heart.**

751 [A] Immunofluorescent staining for collagen 2 (col2, magenta), muscle/pax2 (white) and nuclei (DAPI,  
752 blue); (a, anterior; p, posterior; d, dorsal; v, ventral). [A] (a, e) A lateral view of col2-positive  
753 branchial cartilages in UIC (a) and *p120* CRISPR mutant (e) reveals hypoplasia of mutant cartilages;  
754 however, cell morphology appears normal in *p120* CRISPR mutants (h) (d and h, white arrowheads).  
755 [A] (b-c, f-g) Pax2-expressing muscles revealed a defect in the fibril organization of the rectus  
756 abdominus muscle in the *p120* CRISPR tadpoles (f, white arrowhead) compared to the UIC muscles  
757 (b, white arrowhead); note insets in (c, g).

758 [B] Ventral views of hearts of stage 46 tadpoles. Immunofluorescent staining for p120-catenin  
759 (green), E-cadherin (red) and DNA (blue). [B] (i-m) Controls; (n-r) *p120* CRISPR mutant tadpoles.  
760 Morphologic defects are evident in the size of the heart and directionality of the loops (compare  
761 control heart (i) to mutant heart (n), yellow-dashed outlines). [B] (k, p) p120-catenin is strongly  
762 expressed in the heart of UIC tadpoles (k) but is lost in *p120* CRISPR tadpoles (p). [B] (l, q) Note the  
763 absence of E-cadherin in the control and mutant hearts. Scale bars = 100 $\mu$ m.

764

765 **Figure 9. Model of *CTNND1* function in systemic disease.**

766 [A] *CTNND1* mutations are not only implicated in conditions that affect epithelial structures but also  
767 systemic conditions that originate from mesenchymal roles of p120-catenin. Structures in pink  
768 circles have been described in previous publications on *CTNND1*<sup>1,2</sup>; structures in blue circles have  
769 been implicated previously in *CTNND1*-related disorders<sup>1,2</sup> and in this study; structures in yellow  
770 circles have been identified in this study. [B] Blepharocheilodontic syndrome (BCD) is primarily due  
771 to disturbances in E-cadherin/p120 interactions. The inclusion of other organ systems described  
772 here highlights the involvement of other known molecular functions of p120, such as its role in the

773 WNT signaling pathway and its interactions with Rho-GTPases, demonstrating its mesenchymal roles  
774 in producing these systemic conditions.

775

776 **TABLES INCLUDED:**

777 Table 1: *CTNND1* variants in index patients.

778 Table 2: Clinical Summary of Individuals with *CTNND1* variant.

779 Table S1: Clinical Details of Individuals with a *CTNND1* variant.

780 Table S2: Reported congenitally missing teeth.

781

782

## REFERENCES:

1. Kievit A, Tessadori F, Douben H, et al. Variants in members of the cadherin-catenin complex, CDH1 and CTNND1, cause blepharocheilodontic syndrome. *Eur J Hum Genet.* 2018;26(2):210-219.
2. Ghoumid J, Stichelbout M, Jourdain AS, et al. Blepharocheilodontic syndrome is a CDH1 pathway-related disorder due to mutations in CDH1 and CTNND1. *Genetics in medicine : official journal of the American College of Medical Genetics.* 2017;19(9):1013-1021.
3. Cox LL, Cox TC, Moreno Uribe LM, et al. Mutations in the Epithelial Cadherin-p120-Catenin Complex Cause Mendelian Non-Syndromic Cleft Lip with or without Cleft Palate. *Am J Hum Genet.* 2018;102(6):1143-1157.
4. Perez-Moreno M, Davis MA, Wong E, Pasolli HA, Reynolds AB, Fuchs E. p120-catenin mediates inflammatory responses in the skin. *Cell.* 2006;124(3):631-644.
5. Oas RG, Xiao K, Summers S, et al. p120-Catenin is required for mouse vascular development. *Circ Res.* 2010;106(5):941.
6. Marciano DK, Brakeman PR, Lee C-Z, et al. p120 catenin is required for normal renal tubulogenesis and glomerulogenesis. *Development.* 2011;138(10):2099-2109.
7. Hendley AM, Provost E, Bailey JM, et al. p120 Catenin is required for normal tubulogenesis but not epithelial integrity in developing mouse pancreas. *Dev Biol.* 2015;399(1):41-53.
8. Elia LP, Yamamoto M, Zang K, Reichardt LF. p120 catenin regulates dendritic spine and synapse development through Rho-family GTPases and cadherins. *Neuron.* 2006;51(1):43-56.
9. Davis MA, Reynolds AB. Blocked acinar development, E-cadherin reduction, and intraepithelial neoplasia upon ablation of p120-catenin in the mouse salivary gland. *Developmental cell.* 2006;10(1):21-31.
10. Bartlett JD, Dobeck JM, Tye CE, et al. Targeted p120-catenin ablation disrupts dental enamel development. *PLoS One.* 2010;5(9):e12703.
11. Ciesiolka M, Delvaeye M, Van Imschoot G, et al. p120 catenin is required for morphogenetic movements involved in the formation of the eyes and the craniofacial skeleton in *Xenopus*. *J Cell Sci.* 2004;117(18):4325-4339.
12. Geis K, Aberle H, Kühl M, Kemler R, Wedlich D. Expression of the Armadillo family member p120 cas 1B in *Xenopus* embryos affects head differentiation but not axis formation. *Dev Genes Evol.* 1998;207(7):471-481.
13. Ishiyama N, Lee S-H, Liu S, et al. Dynamic and static interactions between p120 catenin and E-cadherin regulate the stability of cell-cell adhesion. *Cell.* 2010;141(1):117-128.
14. Ireton RC, Davis MA, van Hengel J, et al. A novel role for p120 catenin in E-cadherin function. *J Cell Biol.* 2002;159(3):465-476.
15. Fukumoto Y, Shintani Y, Reynolds AB, Johnson KR, Wheelock MJ. The regulatory or phosphorylation domain of p120 catenin controls E-cadherin dynamics at the plasma membrane. *Exp Cell Res.* 2008;314(1):52-67.
16. Davis MA, Ireton RC, Reynolds AB. A core function for p120-catenin in cadherin turnover. *J Cell Biol.* 2003;163(3):525-534.



17. Reynolds AB, Daniel J, McCrea PD, Wheelock MJ, Wu J, Zhang Z. Identification of a new catenin: the tyrosine kinase substrate p120cas associates with E-cadherin complexes. *Mol Cell Biol.* 1994;14(12):8333-8342.
18. Anastasiadis PZ, Moon SY, Thoreson MA, et al. Inhibition of RhoA by p120 catenin. *Nature cell biology.* 2000;2(9):637.
19. Wildenberg GA, Dohn MR, Carnahan RH, et al. p120-catenin and p190RhoGAP regulate cell-cell adhesion by coordinating antagonism between Rac and Rho. *Cell.* 2006;127(5):1027-1039.
20. Park J-i, Kim SW, Lyons JP, et al. Kaiso/p120-catenin and TCF/ $\beta$ -catenin complexes coordinately regulate canonical Wnt gene targets. *Developmental cell.* 2005;8(6):843-854.
21. del Valle-Pérez B, Casagolda D, Lugalde E, et al. Wnt controls the transcriptional activity of Kaiso through CK1 $\epsilon$ -dependent phosphorylation of p120-catenin. *J Cell Sci.* 2011;124(13):2298-2309.
22. Yanagisawa M, Anastasiadis PZ. p120 catenin is essential for mesenchymal cadherin-mediated regulation of cell motility and invasiveness. *The Journal of cell biology.* 2006;174(7):1087-1096.
23. Stairs DB, Bayne LJ, Rhoades B, et al. Deletion of p120-catenin results in a tumor microenvironment with inflammation and cancer that establishes it as a tumor suppressor gene. *Cancer Cell.* 2011;19(4):470-483.
24. Schackmann RC, Tenhagen M, van de Ven RA, Derksen PW. p120-catenin in cancer-mechanisms, models and opportunities for intervention. *J Cell Sci.* 2013;126(16):3515-3525.
25. Reynolds AB, Rocznik-Ferguson A. Emerging roles for p120-catenin in cell adhesion and cancer. *Oncogene.* 2004;23(48):7947.
26. Reynolds AB, Jenkins NA, Gilbert DJ, et al. The gene encoding p120cas, a novel catenin, localizes on human chromosome 11q11 (CTNND) and mouse chromosome 2 (Catns). *Genomics.* 1996;31(1):127-129.
27. Montonen O, Aho M, Uitto J, Aho S. Tissue distribution and cell type-specific expression of p120ctn isoforms. *J Histochem Cytochem.* 2001;49(12):1487-1495.
28. Aho S, Levänsuo L, Montonen O, Kari C, Rodeck U, Uitto J. Specific sequences in p120ctn determine subcellular distribution of its multiple isoforms involved in cellular adhesion of normal and malignant epithelial cells. *J Cell Sci.* 2002;115(7):1391-1402.
29. Hong JY, Oh I-H, McCrea PD. Phosphorylation and isoform use in p120-catenin during development and tumorigenesis. *Biochimica et Biophysica Acta (BBA)-Molecular Cell Research.* 2016;1863(1):102-114.
30. Keirsebilck A, Bonn  S, Staes K, et al. Molecular cloning of the human p120ctnCatenin gene (CTNND1): Expression of multiple alternatively spliced isoforms. *Genomics.* 1998;50(2):129-146.
31. Mariner DJ, Wang J, Reynolds AB. ARVCF localizes to the nucleus and adherens junction and is mutually exclusive with p120 (ctn) in E-cadherin complexes. *J Cell Sci.* 2000;113(8):1481-1490.
32. Hatzfeld M. The p120 family of cell adhesion molecules. *Eur J Cell Biol.* 2005;84(2-3):205-214.

33. Gu D, Sater AK, Ji H, et al. Xenopus  $\delta$ -catenin is essential in early embryogenesis and is functionally linked to cadherins and small GTPases. *J Cell Sci.* 2009;122(22):4049-4061.
34. Turner TN, Sharma K, Oh EC, et al. Loss of delta-catenin function in severe autism. *Nature.* 2015;520(7545):51-56.
35. Lu Q, Aguilar BJ, Li M, Jiang Y, Chen Y-H. Genetic alterations of  $\delta$ -catenin/NPRAP/Neurojungin (CTNND2): functional implications in complex human diseases. *Hum Genet.* 2016;135(10):1107-1116.
36. Medina M, Marinescu RC, Overhauser J, Kosik KS. Hemizygoty of  $\delta$ -catenin (CTNND2) is associated with severe mental retardation in cri-du-chat syndrome. *Genomics.* 2000;63(2):157-164.
37. Hofmeister W, Nilsson D, Topa A, et al. CTNND2-a candidate gene for reading problems and mild intellectual disability. *J Med Genet.* 2015;52(2):111-122.
38. Nivard M, Mbarek H, Hottenga J, et al. Further confirmation of the association between anxiety and CTNND2: replication in humans. *Genes, Brain and Behavior.* 2014;13(2):195-201.
39. Belcaro C, Dipresa S, Morini G, Pecile V, Skabar A, Fabretto A. CTNND2 deletion and intellectual disability. *Gene.* 2015;565(1):146-149.
40. Sirotkin H, O'Donnell H, DasGupta R, et al. Identification of a new human catenin gene family member (ARVCF) from the region deleted in velo-cardio-facial syndrome. *Genomics.* 1997;41(1):75-83.
41. Butts SC. The facial phenotype of the velo-cardio-facial syndrome. *Int J Pediatr Otorhinolaryngol.* 2009;73(3):343-350.
42. Shprintzen R, Goldberg R, Lewin M, et al. A new syndrome involving cleft palate, cardiac anomalies, typical facies, and learning disabilities: velo-cardio-facial syndrome. *The Cleft palate journal.* 1978;15(1):56-62.
43. Cho K, Lee M, Gu D, et al. Kazrin, and its binding partners ARVCF - and delta - catenin, are required for Xenopus laevis craniofacial development. *Dev Dyn.* 2011;240(12):2601-2612.
44. Deciphering Developmental Disorders S, McRae JF, Clayton S, et al. Prevalence and architecture of de novo mutations in developmental disorders. *Nature.* 2017;542:433.
45. Kaufman MH, Kaufman MH. *The atlas of mouse development.* Vol 428: Academic press London; 1992.
46. Lewandoski M, Meyers E, Martin G. Analysis of Fgf8 gene function in vertebrate development. Paper presented at: Cold Spring Harbor symposia on quantitative biology 1997.
47. Lewis AE, Vasudevan HN, O'Neill AK, Soriano P, Bush JO. The widely used Wnt1-Cre transgene causes developmental phenotypes by ectopic activation of Wnt signaling. *Dev Biol.* 2013;379(2):229-234.
48. Khokha MK, Chung C, Bustamante EL, et al. Techniques and probes for the study of Xenopus tropicalis development. *Dev Dyn.* 2002;225(4):499-510.
49. Rual JF, Hirozane-Kishikawa T, Hao T, et al. Human ORFeome version 1.1: a platform for reverse proteomics. *Genome Res.* 2004;14(10b):2128-2135.
50. Wilkinson DG, Bailes JA, McMahon AP. Expression of the proto-oncogene int-1 is restricted to specific neural cells in the developing mouse embryo. *Cell.* 1987;50(1):79-88.

51. Karczewski KJ, Francioli LC, Tiao G, et al. Variation across 141,456 human exomes and genomes reveals the spectrum of loss-of-function intolerance across human protein-coding genes. *bioRxiv*. 2019:531210.
52. Xia X, Mariner DJ, Reynolds AB. Adhesion-associated and PKC-modulated changes in serine/threonine phosphorylation of p120-catenin. *Biochemistry (Mosc)*. 2003;42(30):9195-9204.
53. Vinyoles M, Del Valle-Pérez B, Curto J, et al. Multivesicular GSK3 sequestration upon Wnt signaling is controlled by p120-catenin/cadherin interaction with LRP5/6. *Mol Cell*. 2014;53(3):444-457.
54. Sun D, Mcalmon KR, Davies JA, Bernfield M, Hay ED. Simultaneous loss of expression of syndecan-1 and E-cadherin in the embryonic palate during epithelial-mesenchymal transformation. *Int J Dev Biol*. 2003;42(5):733-736.
55. Mariner DJ, Davis MA, Reynolds AB. EGFR signaling to p120-catenin through phosphorylation at Y228. *J Cell Sci*. 2004;117(8):1339-1350.
56. Leopold C, De Barros A, Cellier C, Drouin-Garraud V, Dehesdin D, Marie J-P. Laryngeal abnormalities are frequent in the 22q11 deletion syndrome. *Int J Pediatr Otorhinolaryngol*. 2012;76(1):36-40.
57. Miyamoto RC, Cotton RT, Rope AF, et al. Association of anterior glottic webs with velocardiofacial syndrome (chromosome 22q11. 2 deletion). *Otolaryngology—Head and Neck Surgery*. 2004;130(4):415-417.
58. Fokstuen S, Bottani A, Medeiros PF, Antonarakis SE, Stoll C, Schinzel A. Laryngeal atresia type III (glottic web) with 22q11. 2 microdeletion: report of three patients. *Am J Med Genet*. 1997;70(2):130-133.
59. Shawlot W, Deng JM, Fohn LE, Behringer RR. Restricted  $\beta$ -galactosidase expression of a hygromycin-lacZ gene targeted to the  $\beta$ -actin locus and embryonic lethality of  $\beta$ -actin mutant mice. *Transgenic Res*. 1998;7(2):95-103.
60. Elder PK, French CL, Subramaniam M, Schmidt LJ, Getz MJ. Evidence that the functional beta-actin gene is single copy in most mice and is associated with 5'sequences capable of conferring serum-and cycloheximide-dependent regulation. *Mol Cell Biol*. 1988;8(1):480-485.
61. Tabler JM, Rigney MM, Berman GJ, et al. Cilia-mediated Hedgehog signaling controls form and function in the mammalian larynx. *Elife*. 2017;6.
62. Danielian PS, Muccino D, Rowitch DH, Michael SK, McMahon AP. Modification of gene activity in mouse embryos in utero by a tamoxifen-inducible form of Cre recombinase. *Curr Biol*. 1998;8(24):1323-S1322.
63. Paulson AF, Fang X, Ji H, Reynolds AB, McCrea PD. Misexpression of the Catenin p120ctn1A PerturbsXenopusGastrulation But Does Not Elicit Wnt-Directed Axis Specification. *Dev Biol*. 1999;207(2):350-363.
64. Bhattacharya D, Marfo CA, Li D, Lane M, Khokha MK. CRISPR/Cas9: an inexpensive, efficient loss of function tool to screen human disease genes in Xenopus. *Dev Biol*. 2015;408(2):196-204.
65. Corsten-Janssen N, Saitta SC, Hoefsloot LH, et al. More Clinical Overlap between 22q11.2 Deletion Syndrome and CHARGE Syndrome than Often Anticipated. *Mol Syndromol*. 2013;4(5):235-245.
66. Vissers LE, van Ravenswaaij CM, Admiraal R, et al. Mutations in a new member of the chromodomain gene family cause CHARGE syndrome. *Nat Genet*. 2004;36(9):955-957.

67. Wong MT, Schölvinck EH, Lambeck AJ, van Ravenswaaij-Arts CM. CHARGE syndrome: a review of the immunological aspects. *Eur J Hum Genet.* 2015;23(11):1451.
68. Goos JAC, Swagemakers SMA, Twigg SRF, et al. Identification of causative variants in TXNL4A in Burn-McKeown syndrome and isolated choanal atresia. *Eur J Hum Genet.* 2017;25(10):1126-1133.
69. Lopes VLGD, Guion - Almeida ML, Rodini ESdO. Blepharocheilodontic (BCD) syndrome: expanding the phenotype? *American Journal of Medical Genetics Part A.* 2003;121(3):266-270.
70. Ababneh FK, Al - Swaid A, Elhag A, Youssef T, Alsaif S. Blepharo - cheilo - dontic (BCD) syndrome: Expanding the phenotype, case report and review of literature. *American Journal of Medical Genetics Part A.* 2014;164(6):1525-1529.
71. Hammond NL, Dixon J, Dixon MJ. Periderm: Life-cycle and function during orofacial and epidermal development. Paper presented at: Seminars in cell & developmental biology 2017.
72. Abe R, Endo T, Shimooka S. Maxillary first molar agenesis and other dental anomalies. *The Angle Orthodontist.* 2010;80(6):1002-1009.
73. Nishi E, Masuda K, Arakawa M, et al. Exome sequencing-based identification of mutations in non-syndromic genes among individuals with apparently syndromic features. *American journal of medical genetics Part A.* 2016;170(11):2889-2894.
74. Lohi M, Tucker AS, Sharpe PT. Expression of Axin2 indicates a role for canonical Wnt signaling in development of the crown and root during pre - and postnatal tooth development. *Dev Dyn.* 2010;239(1):160-167.
75. Laurikkala J, Mikkola M, Mustonen T, et al. TNF signaling via the ligand-receptor pair ectodysplasin and edar controls the function of epithelial signaling centers and is regulated by Wnt and activin during tooth organogenesis. *Dev Biol.* 2001;229(2):443-455.
76. Wang B, Li H, Liu Y, et al. Expression patterns of WNT/ $\beta$ -CATENIN signaling molecules during human tooth development. *Journal of molecular histology.* 2014;45(5):487-496.
77. Liu F, Chu EY, Watt B, et al. Wnt/beta-catenin signaling directs multiple stages of tooth morphogenesis. *Dev Biol.* 2008;313(1):210-224.
78. Lammi L, Arte S, Somer M, et al. Mutations in AXIN2 cause familial tooth agenesis and predispose to colorectal cancer. *The American Journal of Human Genetics.* 2004;74(5):1043-1050.
79. Callahan N, Modesto A, Meira R, Seymen F, Patir A, Vieira A. Axis inhibition protein 2 (AXIN2) polymorphisms and tooth agenesis. *Arch Oral Biol.* 2009;54(1):45-49.
80. Mostowska A, Biedziak B, Jagodzinski PP. Axis inhibition protein 2 (AXIN2) polymorphisms may be a risk factor for selective tooth agenesis. *J Hum Genet.* 2006;51(3):262.
81. Song S, Zhao R, He H, Zhang J, Feng H, Lin L. WNT10A variants are associated with non-syndromic tooth agenesis in the general population. *Hum Genet.* 2014;133(1):117-124.
82. Mues G, Bonds J, Xiang L, et al. The WNT10A gene in ectodermal dysplasias and selective tooth agenesis. *American Journal of Medical Genetics Part A.* 2014;164(10):2455-2460.

83. van den Boogaard M-J, Créton M, Bronkhorst Y, et al. Mutations in WNT10A are present in more than half of isolated hypodontia cases. *J Med Genet.* 2012;49(5):327-331.
84. Mostowska A, Biedziak B, Zadurska M, Dunin - Wilczynska I, Lianeri M, Jagodzinski P. Nucleotide variants of genes encoding components of the Wnt signalling pathway and the risk of non - syndromic tooth agenesis. *Clin Genet.* 2013;84(5):429-440.
85. Lungova V, Verheyden JM, Sun X, Thibeault SL.  $\beta$ -Catenin signaling is essential for mammalian larynx recanalization and the establishment of vocal fold progenitor cells. *Development.* 2018;145(4):dev157677.
86. Park J-i, Ji H, Jun S, et al. Frado links Dishevelled to the p120-catenin/Kaiso pathway: distinct catenin subfamilies promote Wnt signals. *Developmental cell.* 2006;11(5):683-695.
87. Kim SW, Park J-I, Spring CM, et al. Non-canonical Wnt signals are modulated by the Kaiso transcriptional repressor and p120-catenin. *Nature cell biology.* 2004;6(12):1212.
88. Buckingham M, Meilhac S, Zaffran S. Building the mammalian heart from two sources of myocardial cells. *Nature Reviews Genetics.* 2005;6(11):826.
89. Srivastava D, Thomas T, Lin Q, Kirby ML, Brown D, Olson EN. Regulation of cardiac mesodermal and neural crest development by the bHLH transcription factor, dHAND. *Nat Genet.* 1997;16(2):154.
90. Kochilas L, Merscher-Gomez S, Lu MM, et al. The role of neural crest during cardiac development in a mouse model of DiGeorge syndrome. *Dev Biol.* 2002;251(1):157-166.
91. Eley L, Alqahtani AM, MacGrogan D, et al. A novel source of arterial valve cells linked to bicuspid aortic valve without raphe in mice. *Elife.* 2018;7.
92. Peterson JC, Chughtai M, Wisse LJ, et al. Nos3 mutation leads to abnormal neural crest cell and second heart field lineage patterning in bicuspid aortic valve formation. *Disease Models & Mechanisms.* 2018:dmm. 034637.
93. Smalley-Freed WG, Efimov A, Burnett PE, et al. p120-catenin is essential for maintenance of barrier function and intestinal homeostasis in mice. *The Journal of clinical investigation.* 2010;120(6):1824-1835.
94. Lehman HL, Yang X, Welsh PA, Stairs DB. p120-catenin down-regulation and epidermal growth factor receptor overexpression results in a transformed epithelium that mimics esophageal squamous cell carcinoma. *The American journal of pathology.* 2015;185(1):240-251.

**A**

**Patients 1 & 2**

+/+ Val148Aspfs\*24/+

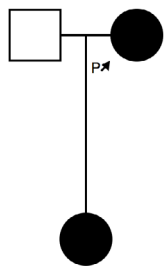

Val148Aspfs\*24/+

**Patient 3**

Arg315Cys/+ +/+

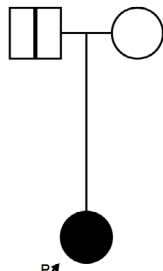

Arg461\*/Arg315Cys

**Patient 4**

+/+ +/+

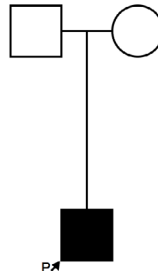

Arg461\*/+

**Patient 5**

+/+ +/+

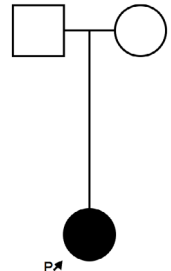

Arg797\*/+

**Patients 6 & 7**

+/+ Leu494Argfs\*5/+

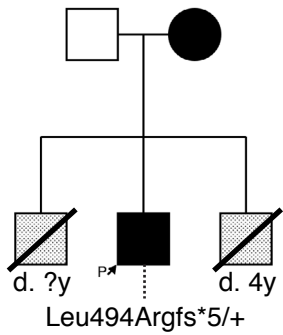

Leu494Argfs\*5/+

**Patient 8**

+/+ +/+

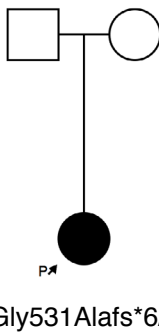

Gly531Alafs\*6/+

**Patients 9 & 10**

Ser868\*/+ +/+

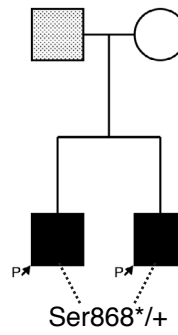

Ser868\*/+

**Patient 11**

+/+ +/+

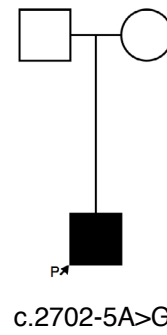

c.2702-5A>G/+

**Patients 12 & 13**

+/+ +/+

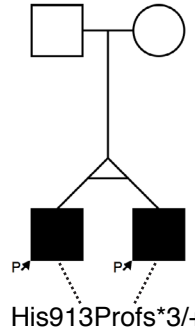

His913Profs\*3/+

**B**

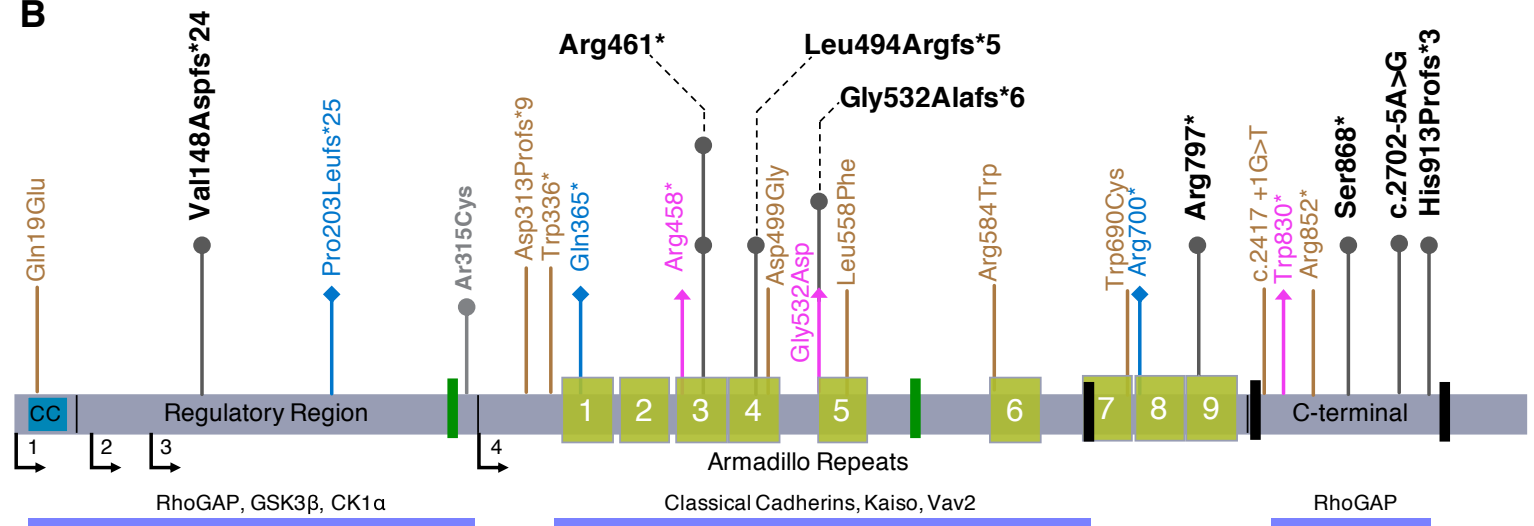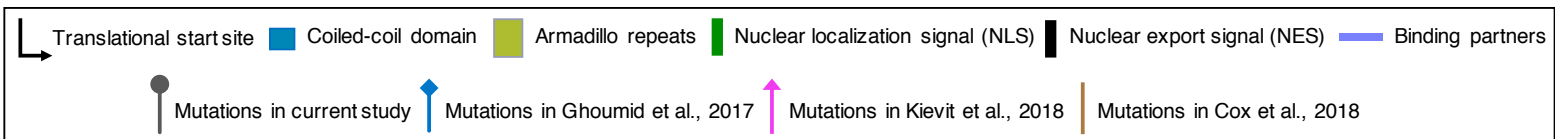

Alharatani, Figure 1

Figure 2 omitted for BIORXIV version.  
Figure 3 omitted for BIORXIV version.

### High-arched palate

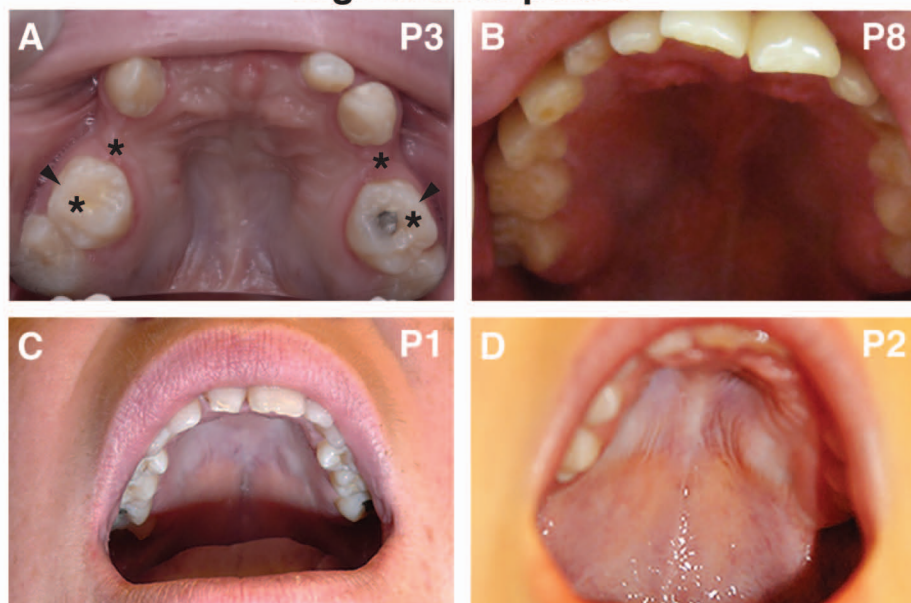

### Malformations

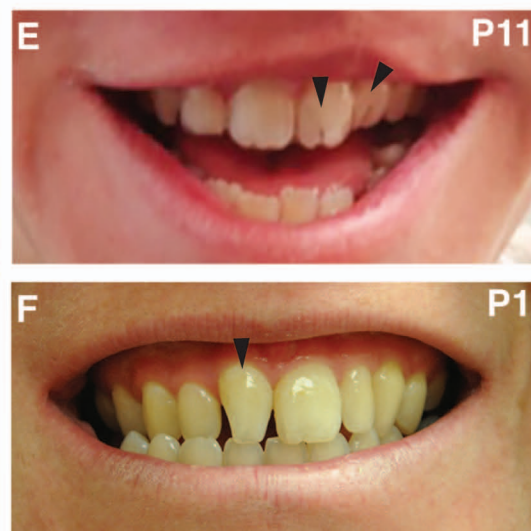

### Hypodontia

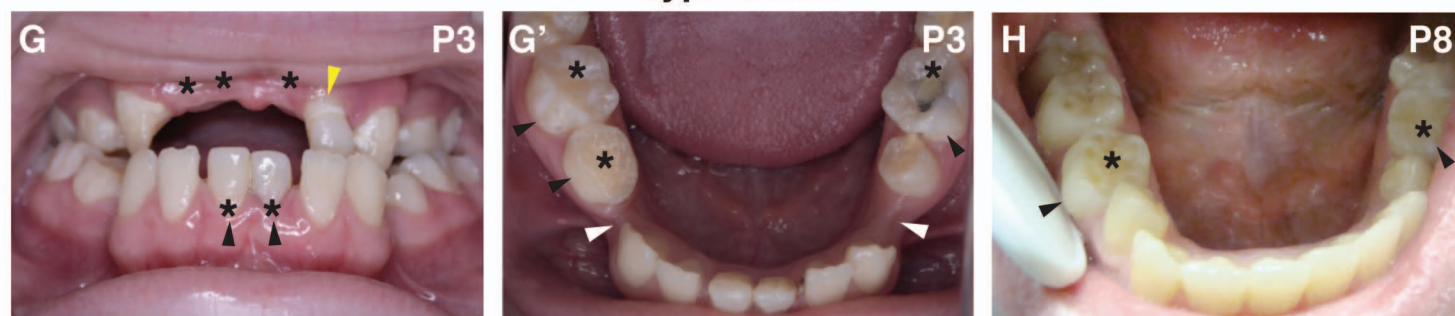

### Dental Orthopantograms

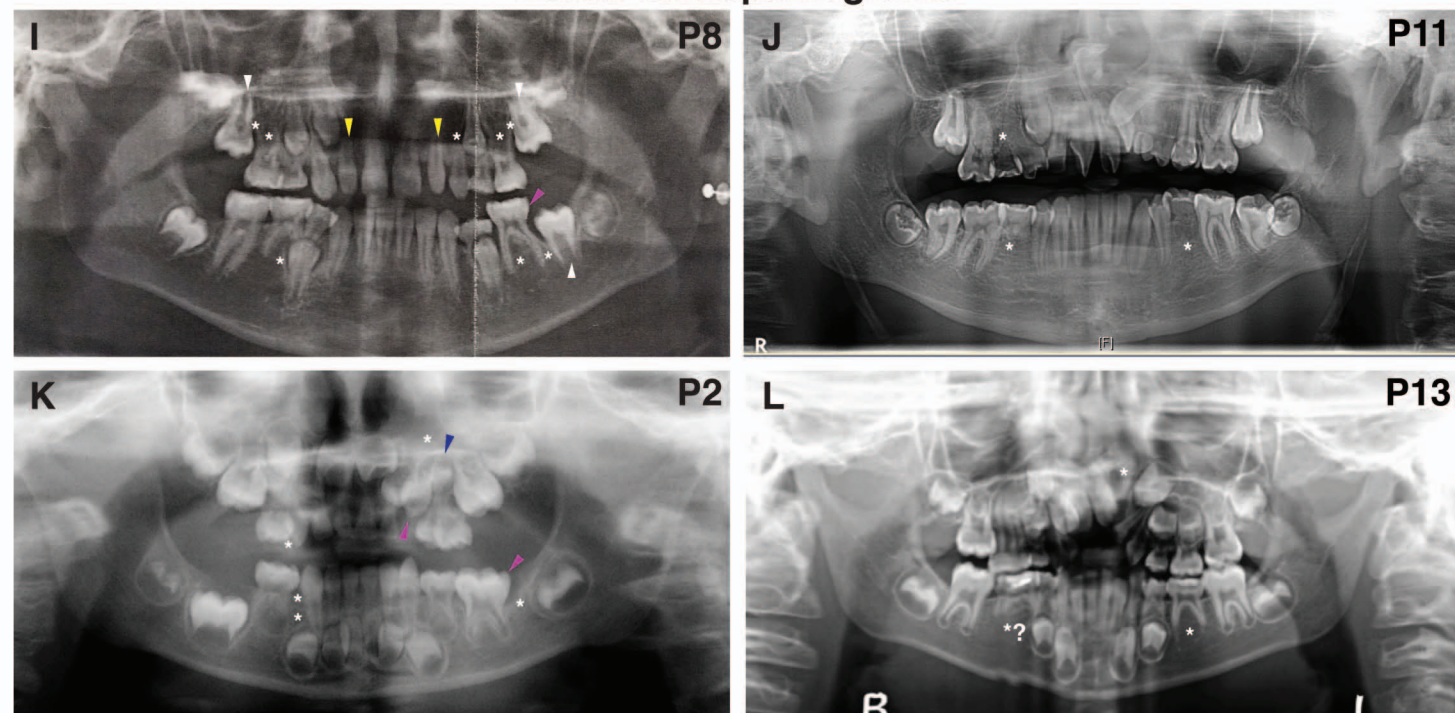

Alharatani, Figure 3



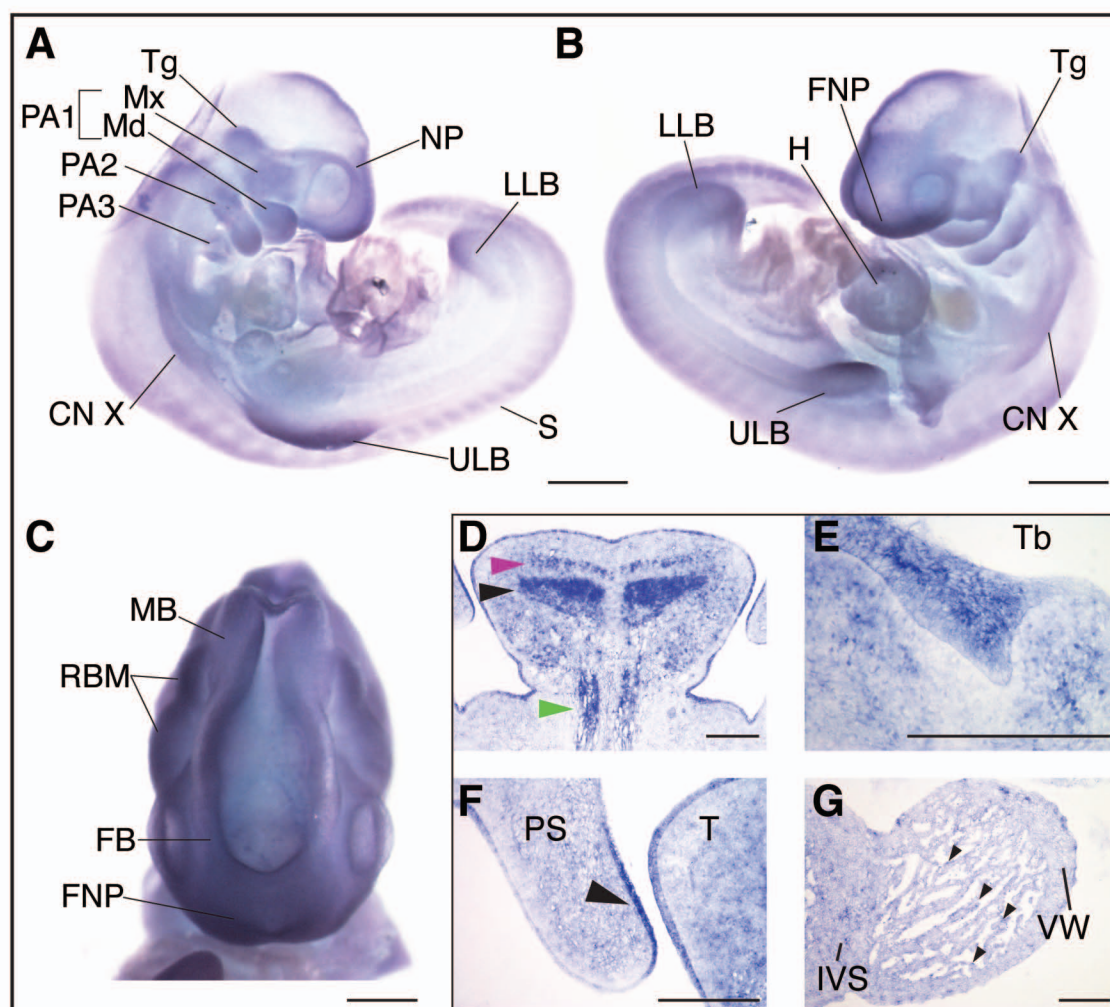

Alharatani, Figure 4

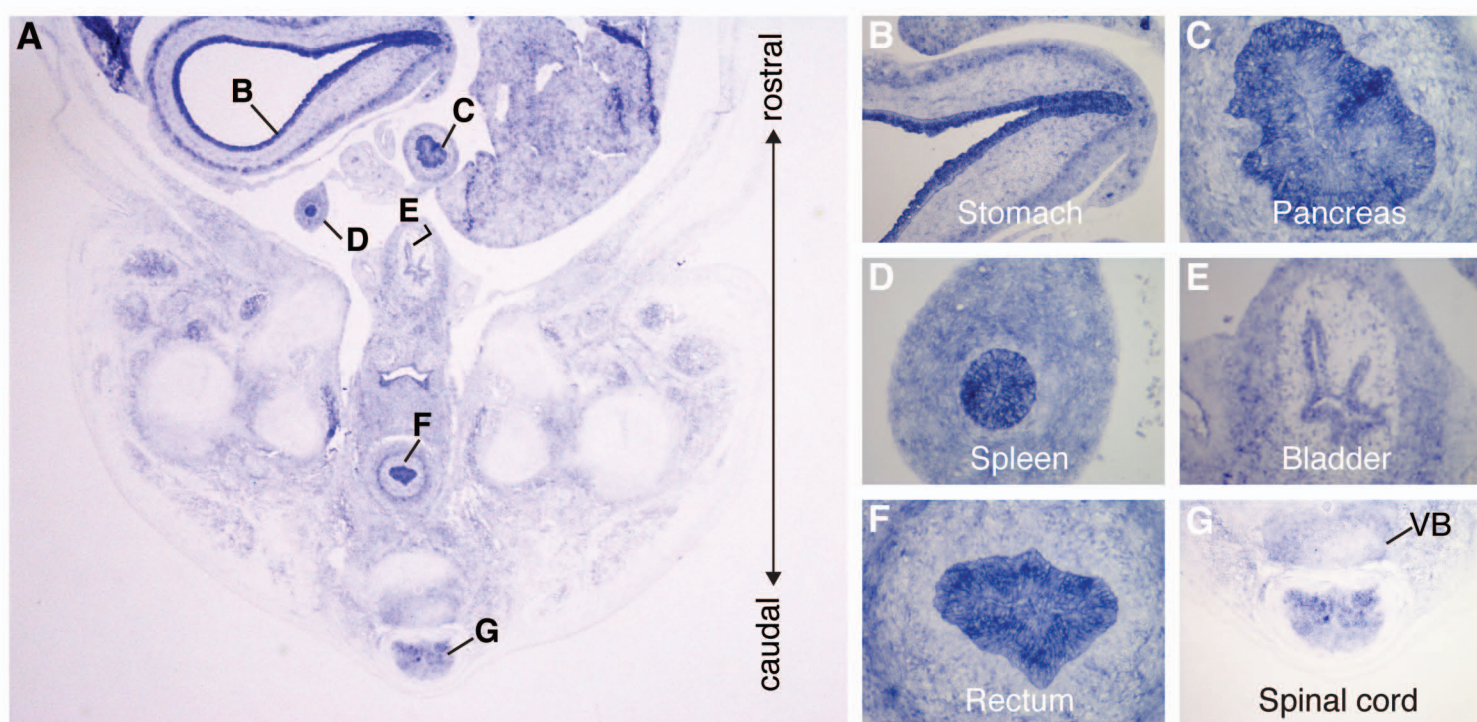

Alharatani, Figure 4 Supplemental S2

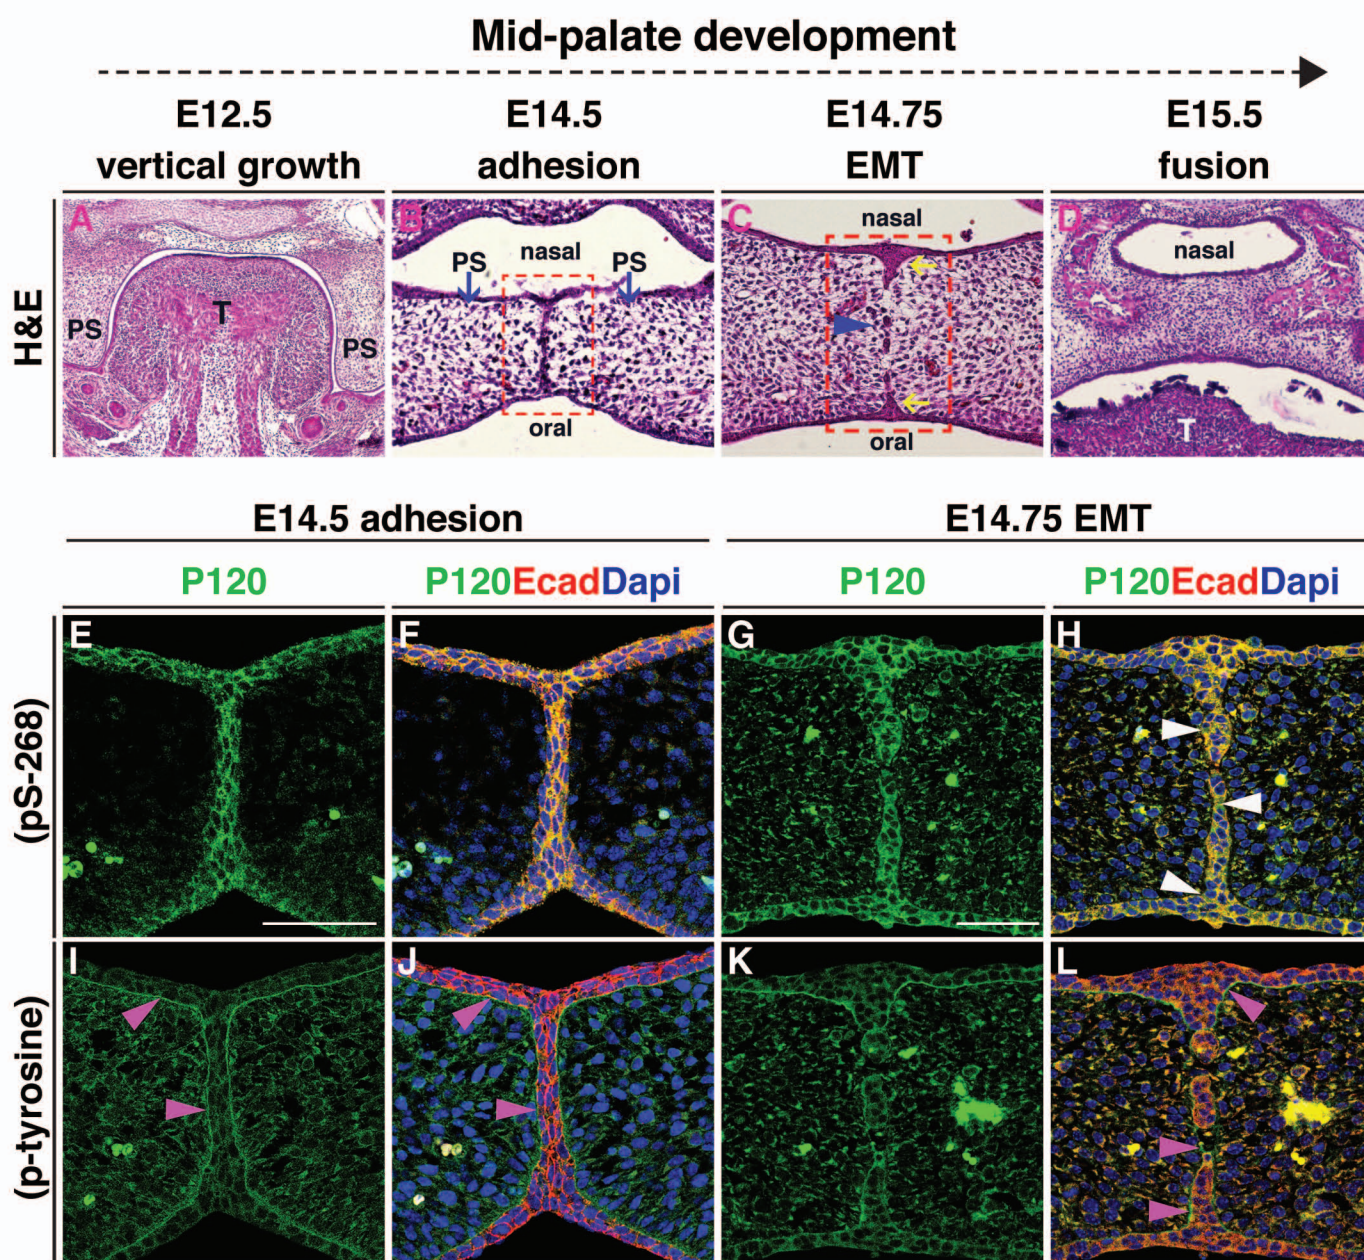

Alharatani, Figure 5

### Muscle and connective tissue malformations

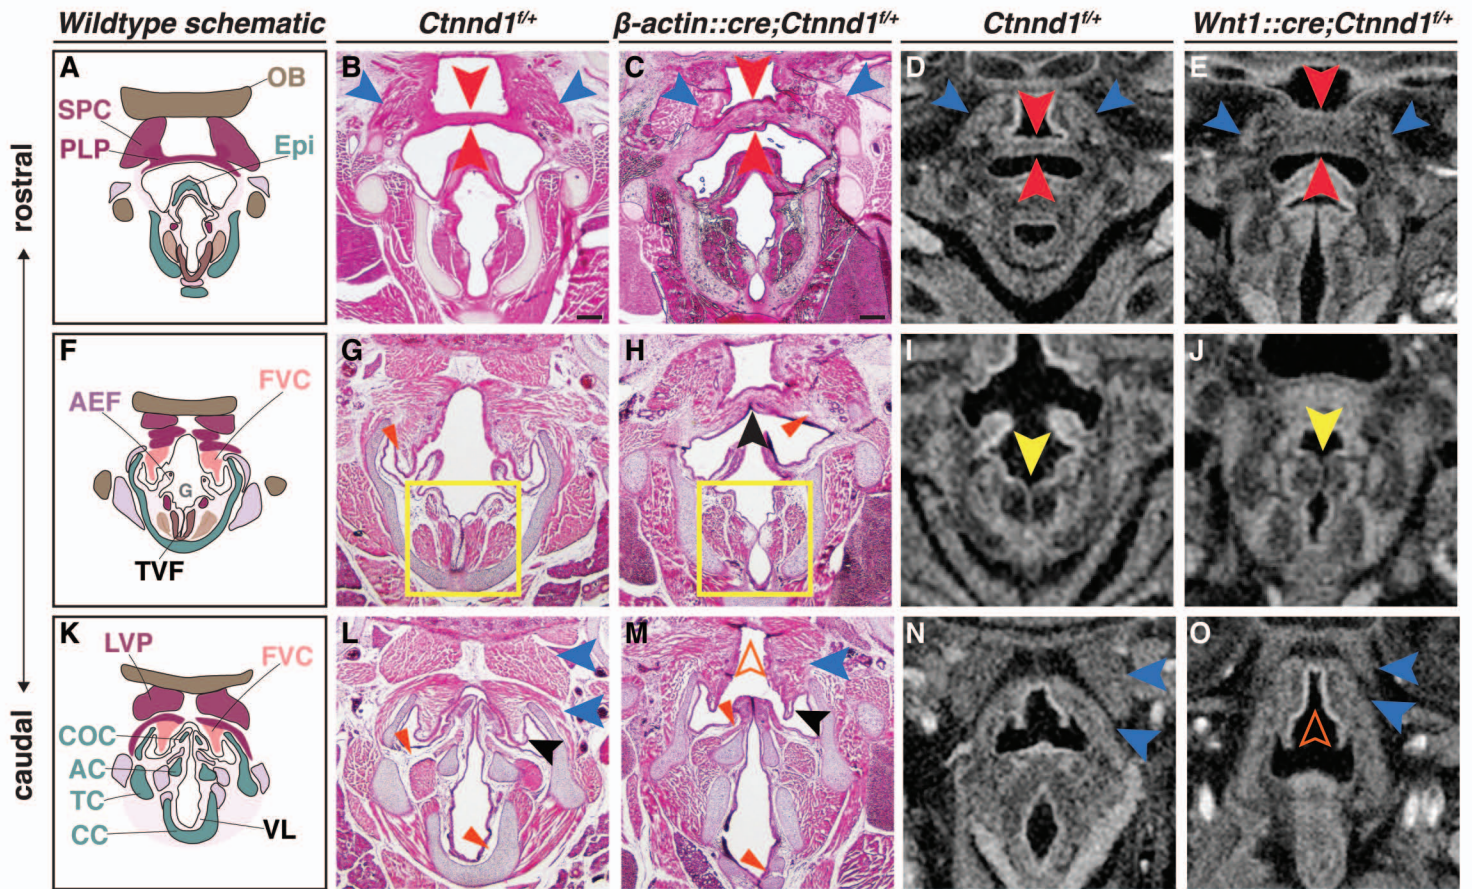

### Laryngeal webbing

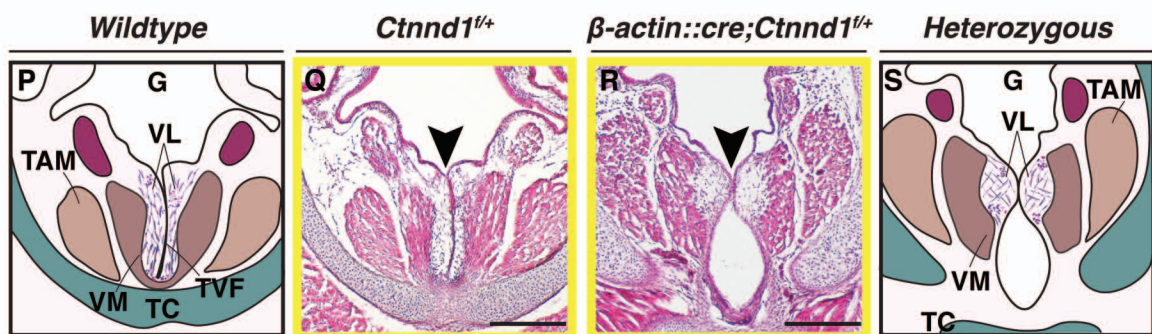

Alharatani, Figure 6

## A Laryngeal and pharyngeal apparatuses

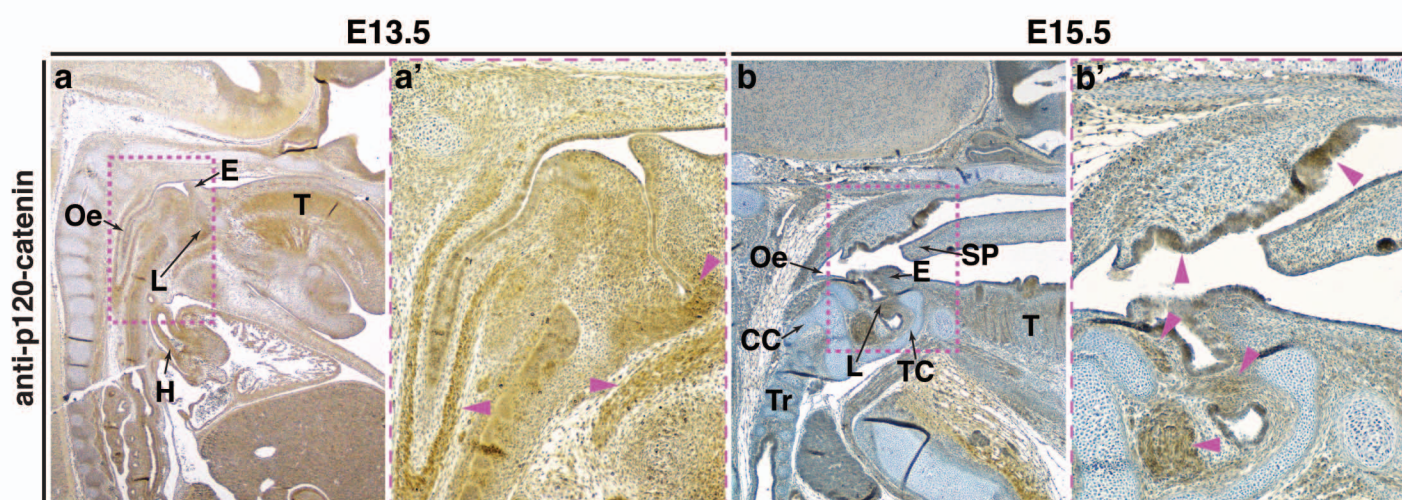

## B Extraoral and palatal features

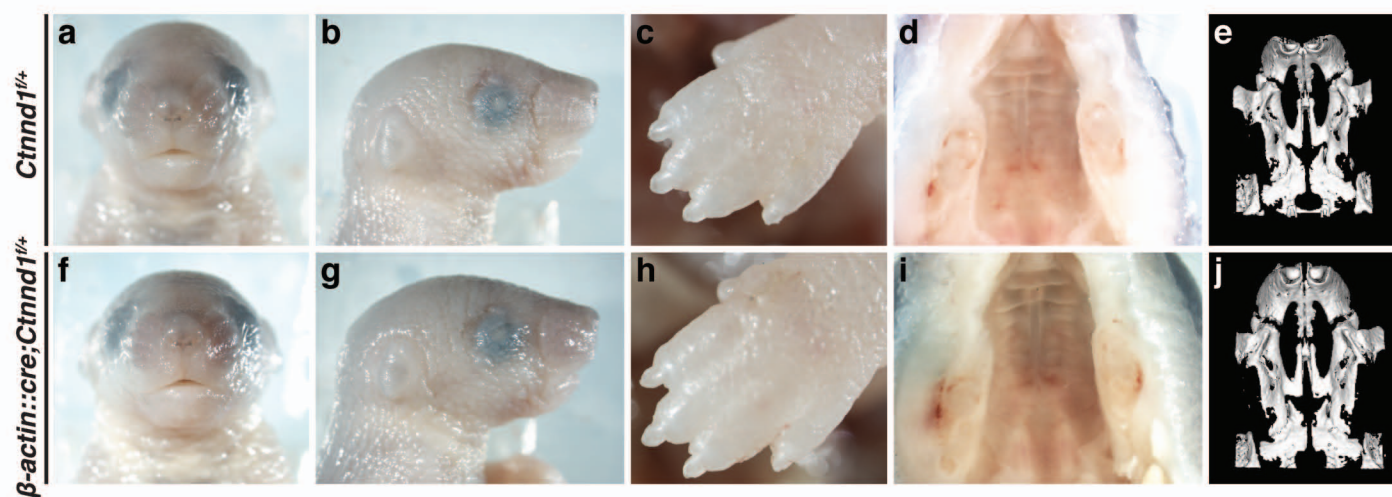

Alharatani, Figure 6 Supplemental S3

**A**

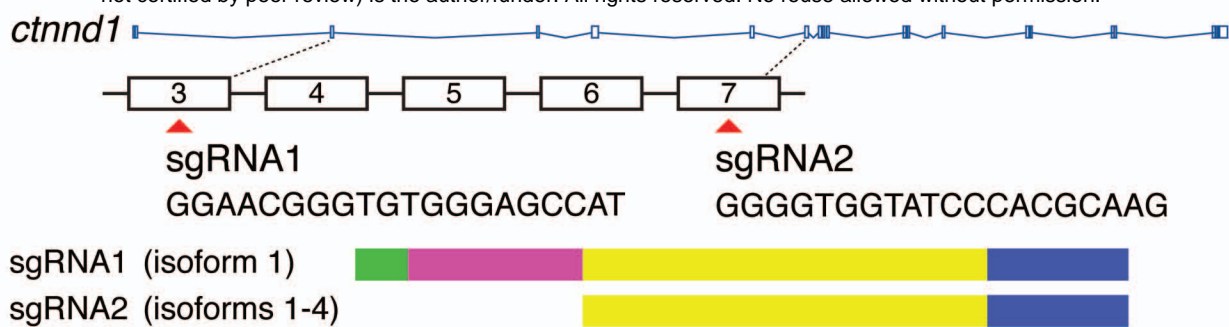

**B**

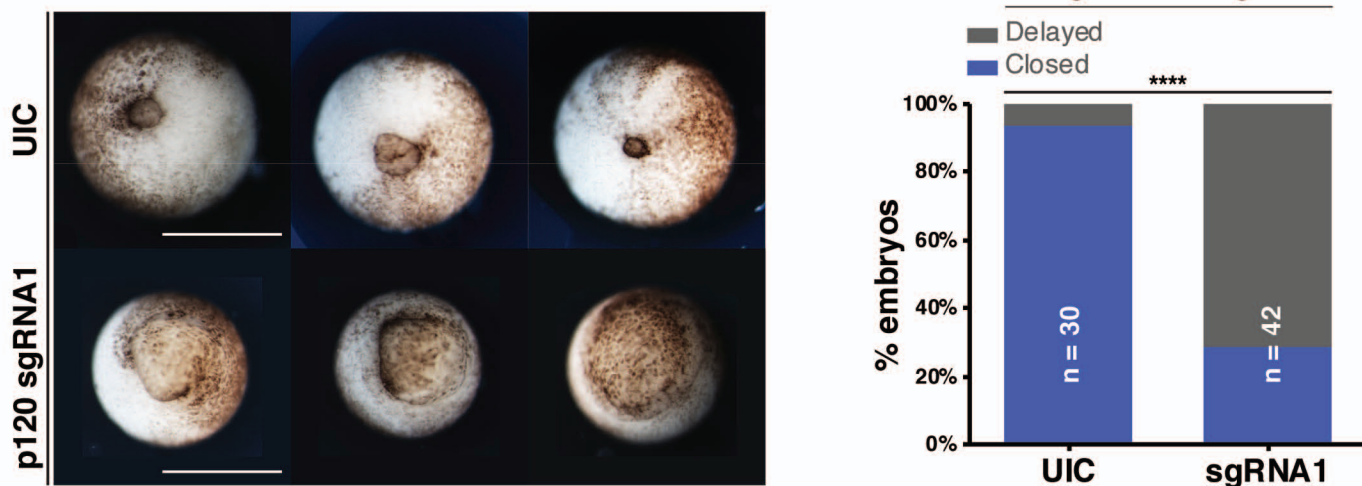

**C**

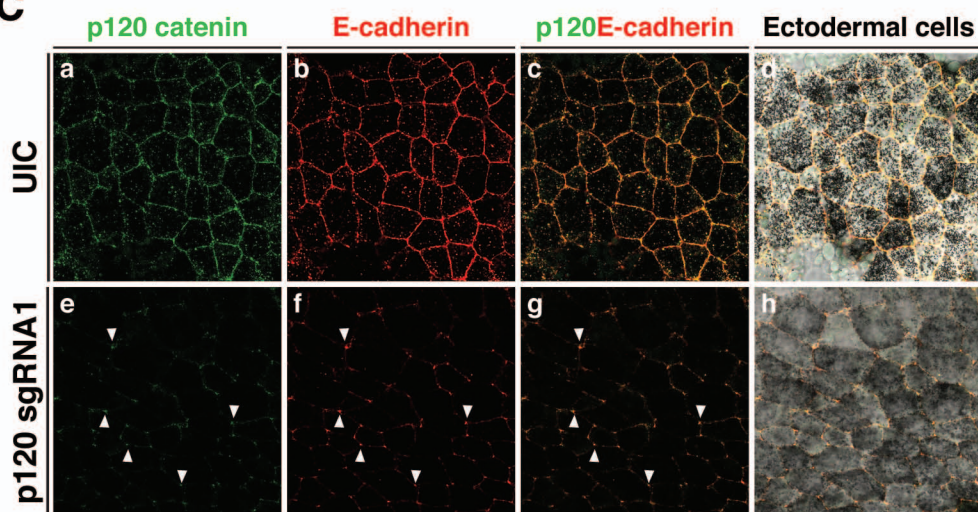

**D**

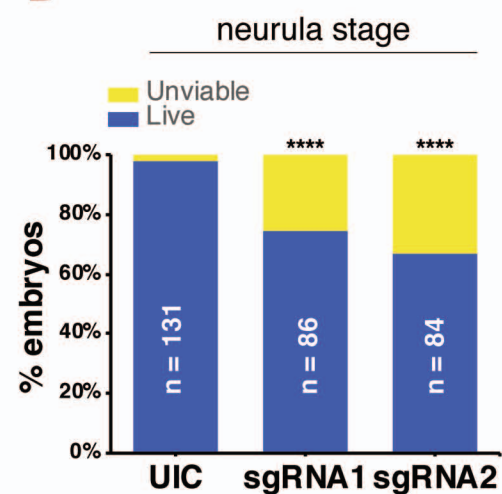

**E**

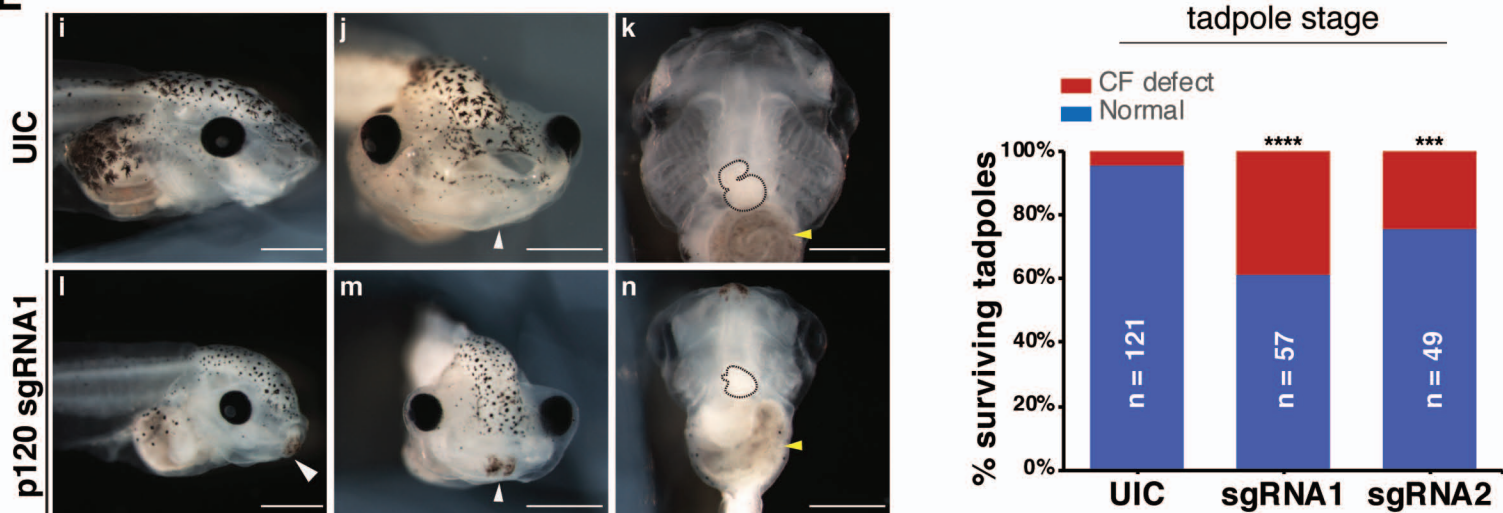

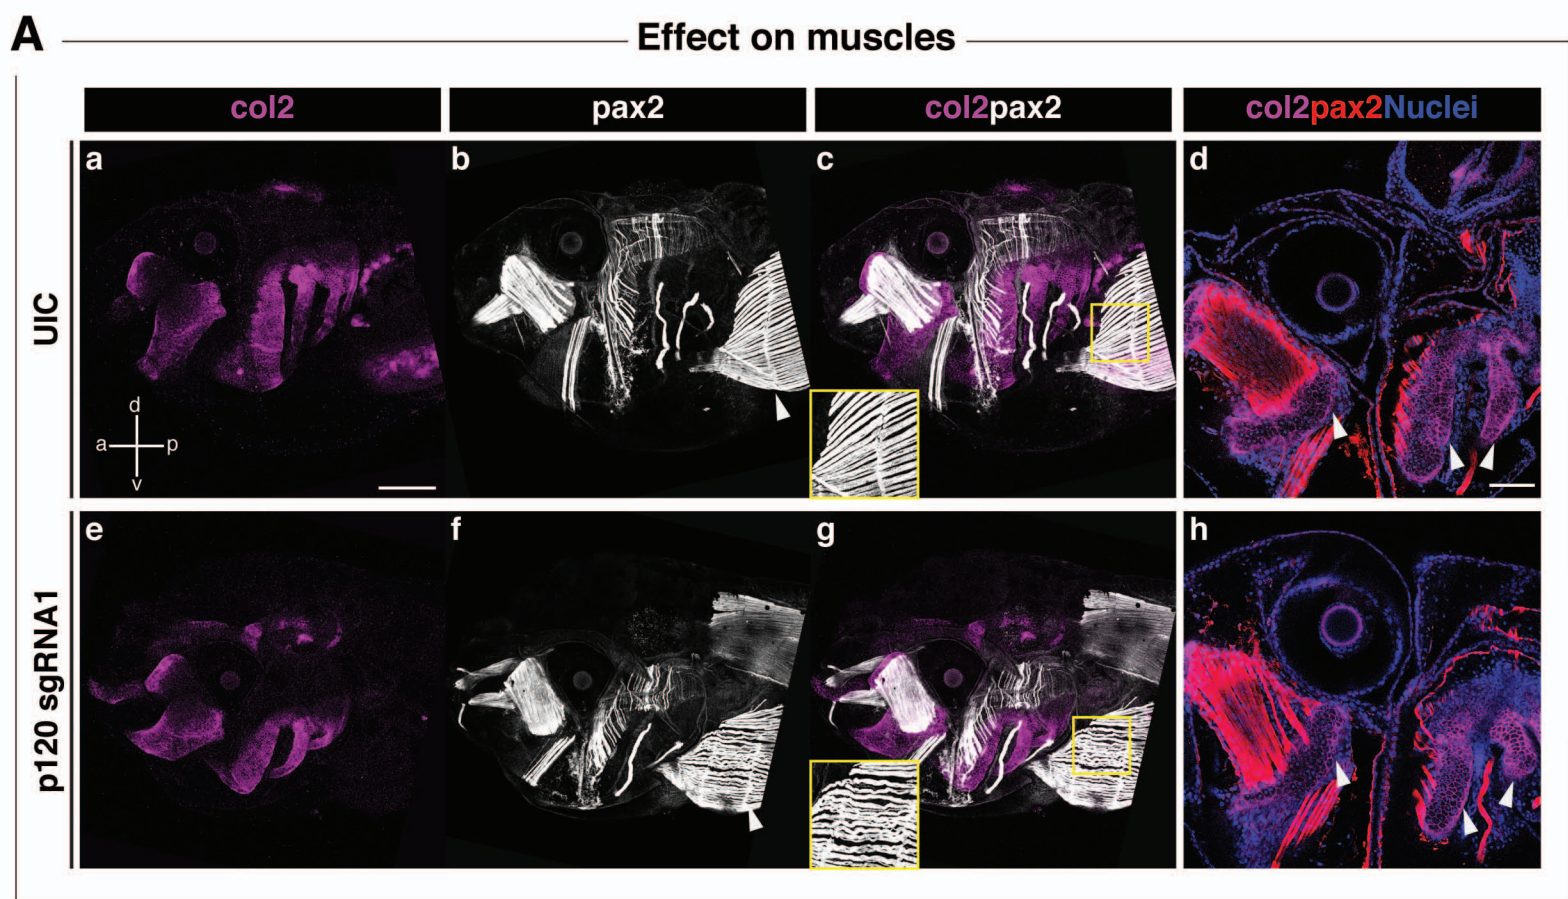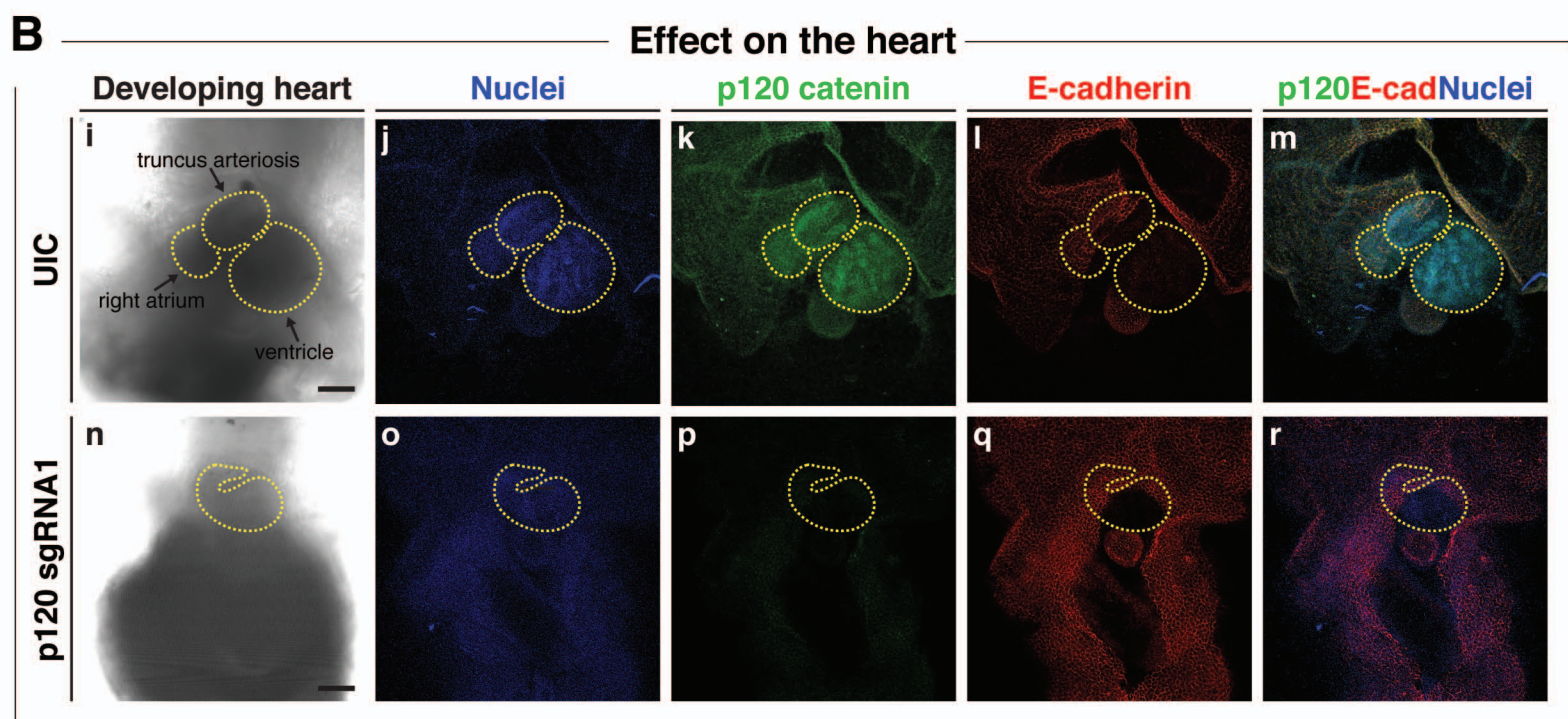

Alharatani, Figure 8

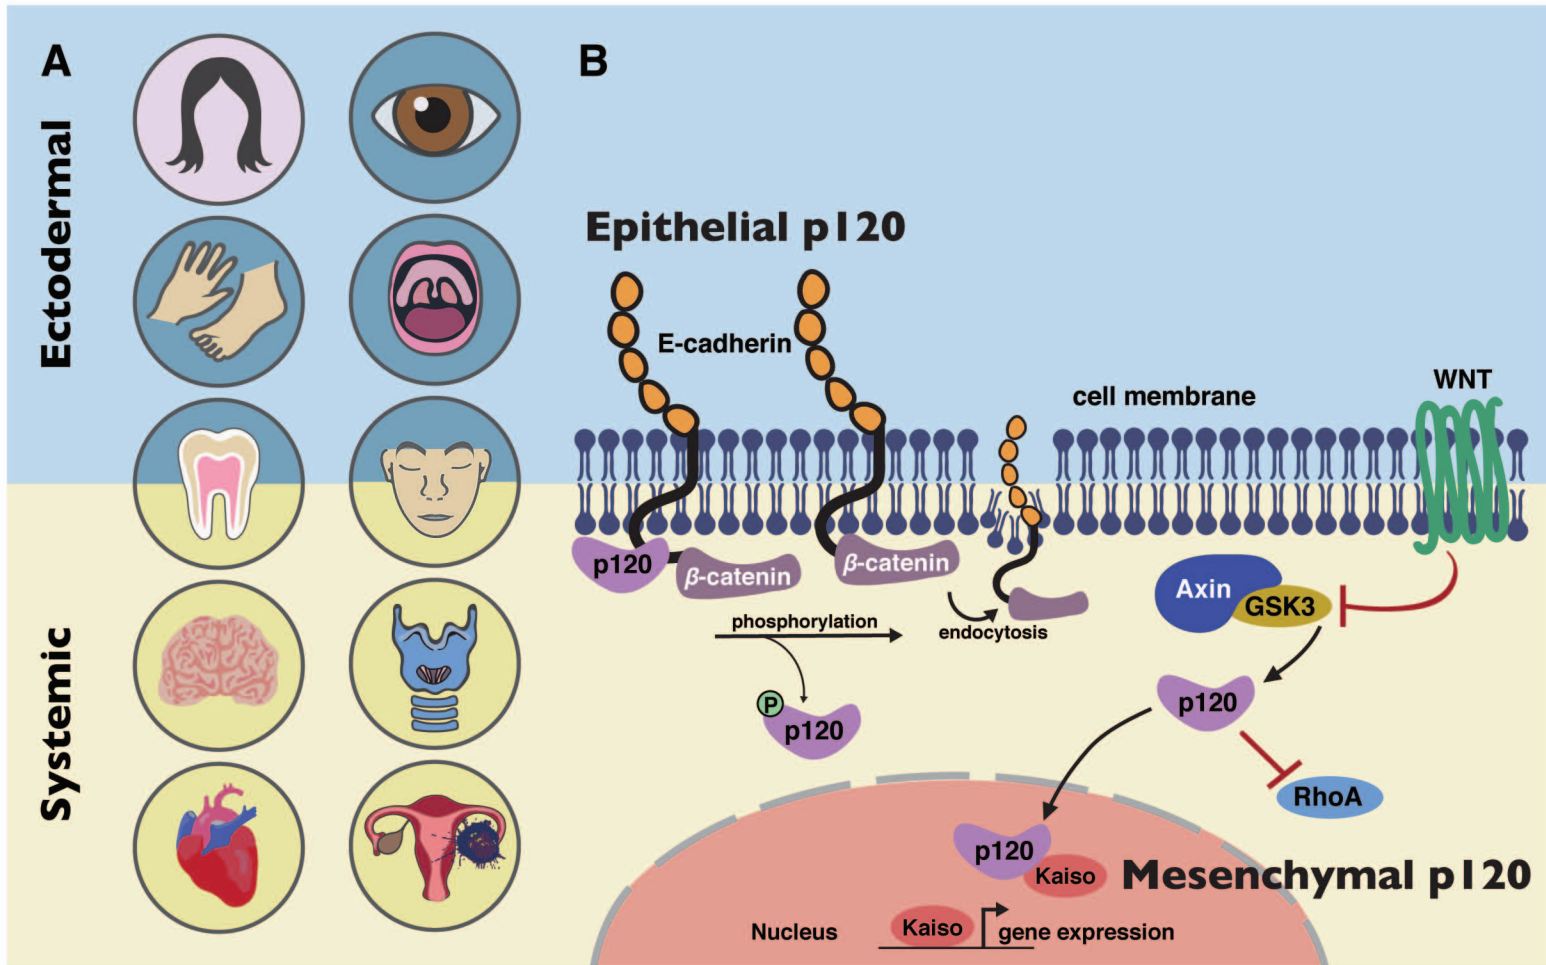

Alharatani, Figure 9



**Table 1. *CTNND1* variants in index patients**

| Patient ID | Mutation: NM_00108558.1 | Protein: NP_001078927.1 | Variant type | Exon  | gnomAD                       |
|------------|-------------------------|-------------------------|--------------|-------|------------------------------|
| Patient 1  | c.443_444delTG          | p.Val148Aspfs*24        | frameshift   | 6     | novel                        |
| Patient 2  | c.443_444delTG          | p.Val148Aspfs*24        | frameshift   | 6     | novel                        |
| Patient 3  | c.943C>T                | p.Arg315Cys             | missense     | 6     | 2.44e-4<br>8 FE, 39 NFE, 4 A |
| Patient 3  | c.1381C>T               | p.Arg461*               | nonsense     | 7     | novel                        |
| Patient 4  | c.1381C>T               | p.Arg461*               | nonsense     | 7     | novel                        |
| Patient 5  | c.2389C>T               | p.Arg797*               | nonsense     | 15    | novel                        |
| Patient 6  | c.1481_1485del          | p.Leu494Argfs*5         | frameshift   | 8     | novel                        |
| Patient 7  | c.1481_1485del          | p.Leu494Argfs*5         | frameshift   | 8     | novel                        |
| Patient 8  | c.1595del               | p.Gly532Alafs*6         | frameshift   | 8     | novel                        |
| Patient 9  | c.2598_2601dupTGAT      | p.Ser868*               | nonsense     | 17    | novel                        |
| Patient 10 | c.2598_2601dupTGAT      | p.Ser868*               | nonsense     | 17    | novel                        |
| Patient 11 | c.2702-5A>G             | p.?                     | splice site  | 18-19 | novel                        |
| Patient 12 | c.2737dupC              | p.His913Profs*3         | frameshift   | 19    | novel                        |
| Patient 13 | c.2737dupC              | p.His913Profs*3         | frameshift   | 19    | novel                        |

The Human GRCh37 (hg19) Assembly was used to identify transcript positions. The annotations are all based on the NM\_001085458 transcript. Confirmations using <https://variantvalidator.org>.

\*Denotes termination codon; FE, Finnish European; NFE, Non-Finnish European; A, African.

**Table 2. Clinical Summary of Individuals with CTNND1 Variants**

| Participants                         | 1          | 2        | 3     | 4     | 5     | 6         | 7         | 8         | 9     | 10    | 11          | 12        | 13        | Total |
|--------------------------------------|------------|----------|-------|-------|-------|-----------|-----------|-----------|-------|-------|-------------|-----------|-----------|-------|
| Variant                              | V148Dfs*24 | V148D*24 | R461* | R461* | R797* | L494Rfs*5 | L494Rfs*5 | G531Afs*6 | S868* | S868* | c.2702-5A>G | H913Pfs*3 | H913Pfs*3 | -     |
| Sex                                  | F          | F        | F     | M     | F     | F         | M         | F         | M     | M     | M           | M         | M         | 6F/7M |
| <b>Craniofacial</b>                  |            |          |       |       |       |           |           |           |       |       |             |           |           |       |
| Cleft lip/palate                     | -          | -        | +     | -     | -     | +         | +         | -         | +     | +     | +           | +         | +         | 8/13  |
| High-arched palate                   | +          | +        | +     | -     | -     | -         | +         | +         | -     | ND    | -           | +         | +         | 7/13  |
| Thin upper lip                       | +          | +        | -     | -     | -     | -         | +         | +         | +     | -     | +           | +         | -         | 7/13  |
| Choanal atresia                      | +          | +        | -     | -     | -     | -         | -         | +         | -     | -     | +           | -         | -         | 4/13  |
| Ear anomaly                          | -          | +        | +     | +     | -     | +         | +         | +         | +     | +     | +           | -         | -         | 9/13  |
| Wide nasal bridge                    | +          | +        | +     | -     | -     | +         | +         | +         | +     | +     | +           | +         | +         | 11/13 |
| Broad nasal tip                      | +          | -        | +     | -     | -     | -         | +         | +         | +     | +     | +           | -         | -         | 7/13  |
| Mid-facial hypoplasia                | +          | +        | +     | -     | -     | +         | +         | +         | -     | -     | +           | +         | +         | 9/13  |
| Mandibular prognathism               | +          | -        | +     | -     | -     | -         | -         | +         | -     | -     | +           | -         | +         | 5/13  |
| Brachycephaly                        | -          | +        | -     | +     | -     | -         | -         | -         | -     | -     | +           | -         | -         | 3/13  |
| <b>Eyes and eyelids</b>              |            |          |       |       |       |           |           |           |       |       |             |           |           |       |
| Narrow, upslanted palpebral fissures | -          | -        | +     | +     | -     | -         | +         | +         | +     | +     | +           | +         | +         | 9/13  |
| Hooded eyelids                       | -          | -        | +     | +     | -     | -         | -         | +         | +     | +     | +           | +         | +         | 8/13  |
| Telecanthus                          | -          | -        | +     | +     | -     | -         | -         | -         | +     | +     | +           | +         | +         | 7/13  |
| High arched eyebrows                 | +          | +        | -     | -     | -     | +         | +         | +         | -     | -     | +           | +         | +         | 8/13  |
| Thin lateral eyebrows                | +          | -        | -     | -     | +     | +         | +         | +         | +     | +     | +           | -         | -         | 8/13  |
| Mild ectropion                       | +          | -        | -     | +     | +     | +         | -         | -         | -     | -     | -           | -         | -         | 4/13  |
| Distichiasis                         | +          | +        | -     | -     | +     | -         | +         | -         | -     | -     | -           | -         | -         | 4/13  |
| Ankyloblepharon                      | -          | +        | -     | -     | -     | -         | +         | -         | +     | -     | -           | -         | -         | 3/13  |
| <b>Dental anomalies</b>              |            |          |       |       |       |           |           |           |       |       |             |           |           |       |
| Hypodontia                           | +          | +        | +     | +     | +     | -         | -         | +         | ND    | ND    | +           | -         | +         | 8/13  |
| Delayed dentition                    | +          | +        | -     | +     | +     | -         | -         | ND        | ND    | ND    | +           | -         | +         | 6/13  |
| Abnormal crown form                  | +          | +        | +     | -     | +     | -         | +         | +         | +     | ND    | +           | +         | -         | 9/13  |

|                    |                         |                          |                                     |                                          |              |   |             |   |                      |    |   |                |                     |   |            |
|--------------------|-------------------------|--------------------------|-------------------------------------|------------------------------------------|--------------|---|-------------|---|----------------------|----|---|----------------|---------------------|---|------------|
| Cardiac disease    |                         |                          |                                     |                                          |              |   |             |   |                      |    |   |                |                     |   |            |
|                    | VSD                     | +                        | +                                   | -                                        | +            | - | -           | - | -                    | -  | - | +              | +                   | - | total 6/13 |
|                    | TOF                     | -                        | -                                   | -                                        | -            | - | -           | - | +                    | -  | - | -              | -                   | - |            |
|                    | ASd or PFO              | +                        | +                                   | -                                        | +            | - | -           | - | -                    | -  | - | -              | -                   | - |            |
|                    | MVS                     | +                        | -                                   | -                                        | -            | - | -           | - | -                    | -  | - | -              | -                   | - |            |
|                    | PS or COA               | -                        | -                                   | -                                        | -            | - | -           | - | -                    | -  | - | +              | -                   | - |            |
|                    | PDA                     | -                        | +                                   | -                                        | -            | - | -           | - | -                    | -  | - | -              | -                   | - |            |
|                    | Hypoplastic aortic arch | +                        | -                                   | -                                        | -            | - | -           | - | -                    | -  | - | +              | -                   | - |            |
| Neurodevelopmental |                         |                          |                                     |                                          |              |   |             |   |                      |    |   |                |                     |   |            |
|                    | ASD                     | -                        | UI                                  | +                                        | +            | - | -           | - | -                    | UI | - | +              | -                   | - | total 8/13 |
|                    | ADHD                    | -                        | +                                   | +                                        | -            | - | -           | - | -                    | -  | - | +              | -                   | - |            |
|                    | DD/LD                   | -                        | +                                   | +                                        | -            | - | -           | - | -                    | -  | + | +              | +                   | + |            |
|                    | Speech & language delay | -                        | -                                   | +                                        | -            | - | -           | - | -                    | -  | + | +              | -                   | - |            |
|                    | Aggressive behaviour    | -                        | +                                   | +                                        | -            | - | -           | - | -                    | +  | + | -              | -                   | - |            |
| Limb anomalies     |                         |                          |                                     |                                          |              |   |             |   |                      |    |   |                |                     |   |            |
|                    | Hands                   | -                        | -                                   | +                                        | -            | - | +           | + | +                    | -  | - | +              | +                   | + | total 9/13 |
|                    | Feet                    | -                        | +                                   | +                                        | +            | - | +           | + | -                    | -  | - | -              | +                   | + | 7/13       |
| Voice anomalies    |                         |                          |                                     |                                          |              |   |             |   |                      |    |   |                |                     |   |            |
|                    | Other Skeletal          | +                        | -                                   | +                                        | +            | - | +           | - | -                    | -  | - | +              | -                   | - | total 5/13 |
|                    | Scoliosis               | +                        | -                                   | -                                        | -            | - | +           | - | -                    | -  | - | -              | -                   | - |            |
|                    | Short stature           | -                        | -                                   | -                                        | -            | - | +           | - | -                    | -  | - | +              | -                   | - |            |
| Cancer             |                         |                          |                                     |                                          |              |   |             |   |                      |    |   |                |                     |   |            |
|                    |                         | -                        | -                                   | -                                        | -            | - | -           | - | ovarian dysgerminoma | -  | - | -              | -                   | - | 1/13       |
| Other anomalies    |                         |                          |                                     |                                          |              |   |             |   |                      |    |   |                |                     |   |            |
|                    |                         | restrictive lung disease | partial agenesis of corpus callosum | VPI, early onset puberty, bowel problems | joint laxity | - | hypothyroid | - | macroglоссия         | -  | - | cryptorchidism | coronal hypospadias | - | -          |

---

Abbreviation: UI, under investigation, ND; not determined because of non-availability; VSd, ventricular septal defect; ASd, atrial septal defect; TOF, tetralogy of Fallot; CoA, coarctation of the aorta; MVS, mitral valve stenosis; PDA, patent ductus arteriosus; PFO, patent foramen ovale; ASD, autism spectrum disorder; ADHD, attention deficit hyperactivity disorder; DD, developmental delay; LD, learning difficulty; VPI, velo-pharyngeal insufficiency.

---



**Table S2. Reported congenitally missing teeth**

| <b>Patient ID</b> | <b>Missing teeth</b>                                              |
|-------------------|-------------------------------------------------------------------|
| Patient 1         | <i>16</i> , 15, <b>23</b> , 25, 26, 36, <b>35</b> , 45, <i>46</i> |
| Patient 2         | 54, 84 and <b>23</b> , 36, 44                                     |
| Patient 3         | 15, 14, 12, 11, 21, 24, 25, <b>35</b> , 31, 41, 44, 45            |
| Patient 5         | 23,25, 45                                                         |
| Patient 8         | <i>16</i> , 15, <b>23</b> , 25, 26, 36, <b>35</b> , 45            |
| Patient 11        | 15, <b>35</b> , 45                                                |
| Patient 13        | 22, <b>35</b> , 45                                                |

Missing permanent canines are in bold and missing permanent first molars are in italics.
